1 **Contemporary circulating enterovirus D68 strains show differential viral entry and**  
2 **replication in human neuronal cells**

3

4 David M Brown<sup>1</sup>, Alison M Hixon<sup>2</sup>, Lauren M Oldfield<sup>1</sup>, Yun Zhang<sup>3</sup>, Mark Novotny<sup>3</sup>, Wei Wang<sup>1,#a</sup>,  
5 Suman R. Das<sup>1,#b</sup>, Reed S Shabman<sup>1,#c</sup>, Kenneth L Tyler<sup>4,5,6</sup>, Richard H Scheuermann<sup>3,7\*</sup>

6

7 <sup>1</sup>J. Craig Venter Institute, Rockville, Maryland, United States of America

8

9 <sup>2</sup>Neuroscience Program and Medical Scientist Training Program, University of Colorado School  
10 of Medicine, Aurora, Colorado, United States of America

11

12 <sup>3</sup>J. Craig Venter Institute, La Jolla, California, United States of America

13

14 <sup>4</sup>Department of Neurology, University of Colorado School of Medicine, Aurora, Colorado, United  
15 States of America

16

17 <sup>5</sup>Denver VA Medical Center, Denver, Colorado, United States of America

18

19 <sup>6</sup>Departments of Immunology and Microbiology, and Medicine, University of Colorado School of  
20 Medicine, Aurora, Colorado, United States of America

21

22 <sup>7</sup>Department of Pathology, University of California, La Jolla, California, United States of America

23

24 <sup>#a</sup>Current address: Viral Immunology Section, NIAID-NIH, Bethesda, Maryland, United States of  
25 America

26

27 <sup>#b</sup>Current address: Department of Medicine, Vanderbilt University School of Medicine, Nashville,  
28 Tennessee, United States of America

29

30 <sup>#c</sup>Current address: American Type Culture Collection (ATCC), Gaithersburg, Maryland, United  
31 States of America

32

33 \* Corresponding author

34 E-mail: RScheuermann@jcvj.org

35

36 **Short Title: Neuronal cell tropism of EV-D68**

37 **Abstract**

38 Historically, enterovirus D68 (EV-D68) has primarily been associated with respiratory  
39 illnesses. However, in the summers of 2014 and 2016 EV-D68 outbreaks coincided with  
40 a spike in polio-like acute flaccid myelitis/paralysis (AFM/AFP) cases. This raised  
41 concerns that the EV-D68 virus could be the causative agent of AFM during these recent  
42 outbreaks. To assess the neurotropic capacity of EV-D68, we explored the use of the  
43 neuroblastoma-derived neuronal cell line, SH-SY5Y, as a tissue culture model to  
44 determine if differential infection permissibility is observed for different EV-D68 strains. In  
45 contrast to HeLa and A549 cells, which support viral infection of all EV-D68 strains tested,  
46 SH-SY5Y cells only supported infection by a subset of contemporary EV-D68 strains,  
47 including members from the 2014 outbreak. Viral replication and infectivity in SH-SY5Y  
48 was assessed using four different assays – infectious virus production, cytopathic effects,  
49 cellular ATP release, and VP1 capsid protein production – with similar results. Similar  
50 differential neurotropism was also observed in differentiated SH-SY5Y cells, primary  
51 human neuron cultures, and a mouse paralysis model. Using the SH-SY5Y cell culture  
52 model, we determined that barriers to viral entry was at least partly responsible for the  
53 differential infectivity phenotype, since transfection of genomic RNA into SH-SY5Y  
54 generated virions for all EV-D68 isolates, but only a single round of replication was  
55 observed from strains which could not directly infect SH-SY5Y. In addition to supporting  
56 virus replication and other functional studies, this cell culture model may help confirm  
57 epidemiological associations between EV-D68 strains and AFM and allow for the rapid  
58 identification of emerging neurotropic strains.

59

## 60 **Author Summary**

61 Since the outbreak during the summer of 2014, EV-D68 has been linked to a type of limb  
62 paralysis referred to as acute flaccid myelitis (AFM), with evidence mounting for the  
63 causal link of EV-D68 to AFM. Among these AFM cases, concurrent EV-D68 infection  
64 was confirmed in several independent epidemiological clusters in four continents. In this  
65 report, we describe a neuronal cell culture model (SH-SY5Y cells) where only a subset of  
66 contemporary 2014 outbreak strains of EV-D68 show infectivity in neuronal cells, or  
67 neurotropism, based on four different assays of viral replication and infection. We further  
68 confirmed the observed difference in neurotropism *in vitro* using primary human neuron  
69 cell cultures and *in vivo* with a mouse paralysis model. Using the SH-SY5Y cell model,  
70 we determined that a barrier to viral entry is at least partly responsible for neurotropism.  
71 SH-SY5Y cells may be useful in determining if specific EV-D68 genetic determinants are  
72 associated with neuropathogenesis, and replication in this cell line could be used as rapid  
73 screening tool for identifying neurotropic EV-D68 strains. This may assist with better  
74 understanding of pathogenesis and epidemiology, and with the development of potential  
75 therapies.

76

## 77 **Introduction**

78 The *Enterovirus* genus in the *Picornaviridae* family comprises many important human  
79 pathogens, including human rhinoviruses (HRV), the most common viral agents of the  
80 common cold; polioviruses, the causative agent of poliomyelitis; enterovirus A71 (EV-  
81 A71), associated with a variety of neurological diseases; and enterovirus D68 (EV-D68).  
82 Enteroviruses appear to continually circulate in human populations, with most infections  
83 being asymptomatic. For example, up to 72 percent of poliovirus infections are  
84 asymptomatic [1]. When poliovirus infections are symptomatic, they can cause a wide  
85 spectrum of clinically-distinct syndromes, ranging from minor, non-specific illness, to non-  
86 paralytic aseptic meningitis and flaccid paralysis [2]. Before the widespread use of  
87 effective vaccines, poliovirus-induced paralysis reached a peak of 21,000 cases in the  
88 U.S. in 1952 [3].

89  
90 EV-D68 was first detected in children with pneumonia and bronchiolitis in 1962 [4]. Until  
91 recently, EV-D68 was one of the most rarely reported enteroviruses, with only 26 cases  
92 documented by the National Enterovirus Surveillance System in the U.S. from 1970 to  
93 2005 [5]. Beginning in 2009, multiple contemporary clades began emerging worldwide  
94 [6]. In the summer and fall of 2014, 49 U.S. states experienced a nationwide outbreak of  
95 severe respiratory illness associated with EV-D68, with 1,153 confirmed cases, including  
96 14 deaths [7]. Shortly after the U.S. outbreak, EV-D68 infections were also reported in  
97 Canada, Europe, and Asia. The total number of reported EV-D68 cases in 2014  
98 exceeded 2,000 from 20 countries, resulting in the public health community classifying  
99 EV-D68 as a re-emerging pathogen of public health concern [8].

100

101 Reports of acute flaccid myelitis (AFM) occurring coincident to the outbreak of respiratory  
102 disease attributed to EV-D68 raised the possibility that EV-D68 might be the causative  
103 agent [7]. EV-D68 infection within a subset of these AFM cases was confirmed in several  
104 independent epidemiological clusters in the U.S. [9-14], France [15], Norway [16] Canada  
105 [17] and Australia [18]. Statistical analyses of the AFM cases in Colorado [12] and  
106 California [19] have supported the association between EV-D68 and AFM, and viral  
107 nucleic acid detection studies of patient samples have failed to reveal an alternative  
108 etiology [7, 10]. During the 2014 EV-D68 outbreak, patients presenting with AFM showed  
109 distinctive magnetic resonance imaging (MRI) findings characterized by brain stem and  
110 gray matter longitudinally extensive spinal cord lesions. This matches the findings  
111 described in previous outbreaks of EV-A71-associated AFM [9, 19, 20], suggesting that  
112 an enterovirus may be responsible. In support of this hypothesis, Hixon *et al.* [21]  
113 established that several contemporary EV-D68 strains, but not the historically archetypal  
114 Fermon and Rhyne EV-D68 strains, can cause a paralytic disease in neonatal mice due  
115 to viral infection and killing of spinal cord motor neurons.

116

117 Phylogenetic analysis reported that many of the 2014 EV-D68 outbreak isolates  
118 associated with AFM appeared to belong to the phylogenetic subclade, B1 [10, 22].  
119 Interestingly, 12 substitutions identified in B1 2014 isolates carry the same amino acid or  
120 nucleotide residues observed at equivalent positions in other paralysis-causing  
121 enteroviruses, including poliovirus and EV-A71 [22]. This suggests that one or more of  
122 the nucleotide substitutions present in contemporary EV-D68 strains and lineages and

123 not found in historical archetypal strains, may be responsible for the apparent increased  
124 incidence of neuropathology associated with the 2014 outbreak. EV-D68 has continued  
125 to evolve since the 2014 outbreak, which is unsurprising as mutation and recombination  
126 are known to occur in enteroviruses [23, 24]. Sequence analysis has led to the  
127 classification of a new clade D (a subclade of A) [25, 26], and a new subclade, B3, has  
128 emerged and quickly expanded [25, 27, 28]. Neurological symptoms have been  
129 associated with the novel B3 clade in Sweden [29], the Netherlands [30], Taiwan [31],  
130 Italy [32] and the United States [33] which experienced another AFM outbreak during the  
131 2016 enterovirus season (summer and fall), with a total of 149 confirmed cases [2]. The  
132 seasonality and magnitude of this AFM outbreak matches the AFM surge observed in  
133 2014. Additional surveillance of potentially emerging neurotropic or neuropathogenic  
134 strains is warranted.

135

136 To test if a specific genotype is associated with neurological symptoms, we report the  
137 development of a cell culture infection model based on the neuroblastoma cell line SH-  
138 SY5Y, that shows differential infectivity by different EV-D68 isolates. We observe a  
139 correlation between infection and replication in SH-SY5Y cells and neuropathogenesis in  
140 mice. This neuronal SH-SY5Y model may be useful for analysis of virus-host interactions  
141 *in vitro* and provides a facile assay to quantify which EV-D68 strains are neurotropic and  
142 neuropathogenic, potentially leading to better surveillance of virulent EV-D68 strains.

143

144

145

146 **Results**

147 **SH-SY5Y cells express higher levels of neuron-specific genes than other candidate**  
148 **cell lines**

149 Seeking a human cell culture to model neuron-specific infectivity, we performed  
150 expression profiling of two commonly used ‘neuronal-like’ cell lines, SH-SY5Y and  
151 HTB10. These cell lines were compared with HeLa cells as a non-neuronal permissive  
152 cell culture model. Both of these neuronal cell lines were first cultured by Biedler *et al.* in  
153 the early 1970s. SH-SY5Y is a subclone of the HTB11 (SK-N-SH) neuroblastoma cell  
154 line that was selected as an apparently homogenous population of cells with neuronal cell  
155 morphology. HTB10 (also known as SK-N-MC), reported as a neuroepithelioma cell line,  
156 has been used as a model for different neurotrophic viruses, such as hepatitis C  
157 poliovirus [34, 35] and enterovirus A71 [36]. We used RNA sequencing (RNAseq) to  
158 determine the genes expressed in SH-SY5Y, HeLa and HTB10, and specifically assessed  
159 the expression of twenty-six neuronal cell marker genes that were selected from the Allen  
160 Brain Atlas [37-39] (<http://brain-map.org>) and from BioGPS [40, 41] (<http://biogps.org>) as  
161 being highly neuron-specific (**Table 1**). Of the 26 selected genes, 22 showed measurable  
162 expression in SH-SY5Y cells, 21 of which showed higher expression levels in SH-SY5Y  
163 compared to HTB10 cells, and little if any expression in HeLa cells. These findings  
164 support the use of SH-SY5Y as a model neuronal cell line, while raising questions about  
165 the suitability of HTB10 as a “neuronal-like” cell line.

166

167

168 **Table 1. Expression of neuron-specific genes in HeLa, HTB10 and SH-SY5Y cell**  
 169 **lines**

| Gene Symbol | Gene Name                                          | HeLa             | HTB10 | SH-SY5Y |
|-------------|----------------------------------------------------|------------------|-------|---------|
| STMN2       | stathmin 2                                         | 0.0 <sup>a</sup> | 0.0   | 1322.5  |
| TCEAL7      | transcription elongation factor A like 7           | 0.0              | 0.0   | 248.5   |
| RGS4        | regulator of G-protein signaling 4                 | 0.0              | 0.0   | 163.7   |
| NNAT        | neuronatin                                         | 0.0              | 0.0   | 45.8    |
| VIP         | vasoactive intestinal peptide                      | 0.0              | 0.0   | 39.3    |
| TAGLN3      | transgelin 3                                       | 0.0              | 0.0   | 39.0    |
| SNAP25      | synaptosome associated protein 25                  | 1.8              | 0.7   | 24.6    |
| LMO1        | LIM domain only 1                                  | 0.6              | 0.0   | 17.0    |
| CAMK2N1     | calmodulin dependent protein kinase II inhibitor 1 | 1.2              | 0.0   | 11.8    |
| SCG2        | secretogranin II                                   | 0.0              | 0.0   | 10.7    |
| CDO1        | cysteine dioxygenase type 1                        | 0.0              | 0.0   | 6.9     |
| SLC10A4     | solute carrier family 10 member 4                  | 0.0              | 0.0   | 3.1     |
| DLX5        | distal-less homeobox 5                             | 0.0              | 0.0   | 2.1     |
| DBH         | dopamine beta-hydroxylase                          | 0.0              | 0.0   | 1.7     |
| SYT17       | synaptotagmin 17                                   | 0.1              | 0.0   | 1.1     |
| CUX2        | cut-like homeobox 2                                | 0.0              | 0.1   | 1.1     |
| CNTN4       | contactin 4                                        | 0.0              | 0.2   | 1.0     |
| DPYSL5      | dihydropyrimidinase like 5                         | 0.0              | 0.2   | 1.0     |
| SV2C        | synaptic vesicle glycoprotein 2C                   | 0.0              | 0.0   | 0.7     |
| ETV1        | ETS variant 1                                      | 0.0              | 0.1   | 0.7     |
| DCN         | decorin                                            | 0.0              | 7.9   | 0.6     |
| NXPH1       | neurexophilin 1                                    | 0.0              | 0.0   | 0.1     |
| FOXP2       | forkhead box P2                                    | 0.2              | 2.2   | 0.0     |
| GAD1        | glutamate decarboxylase 1                          | 0.0              | 0.2   | 0.0     |
| NELL1       | neural EGFL like 1                                 | 0.0              | 0.3   | 0.0     |
| SLC17A7     | solute carrier family 17 member 7                  | 0.0              | 0.6   | 0.0     |

170 <sup>a</sup>Expression levels (transcripts per million reads – TPM) of 26 highly neuron-specific  
 171 marker genes selected from the Allen Brain Atlas (<http://brain-map.org>) and BioGPS  
 172 (<http://biogps.org>) were examined by RNA sequencing.

173

174 **A representative B1 clade EV-D68 strain, US/MO/47, replicates in SH-SY5Y cells**



175 Given the epidemiological association of recent EV-D68 infections with AFM, we sought  
176 to determine if there are any differential growth phenotypes between contemporary and  
177 historical EV-D68 strains in neuronal versus non-neuronal cell lines. To measure viral  
178 replication kinetics, each cell line was infected at a multiplicity of infection (MOI) of 0.1  
179 and the virus growth was measured by determining virus titers (TCID<sub>50</sub>) in culture  
180 supernatant at five time-points post-infection. To examine whether viruses from the B1  
181 clade showed any phenotypic differences in their ability to infect human neuronal cells,  
182 we first selected three different viruses to represent the phylogenetic diversity of EV-D68.  
183 US/MO/14-18947 from Missouri (US/MO/47) was selected as a representative of the B1  
184 clade since it carries all 21 substitutions identified in our previous comparative genomics  
185 analysis [22]. USA/N0051U5/2012 from Tennessee (US/TN) was selected as a  
186 representative of clade A since it was isolated in the U.S. during roughly the same  
187 timeframe as US/MO/47 and possesses none of the 21 substitutions. VR1197 was  
188 selected as an example of an historical isolate similar to the prototypical Fermon strain  
189 isolated in 1962.

190

191 All three EV-D68 strains replicate in the non-neuronal cell lines HeLa (**Fig 1A**) and the  
192 alveolar A549 cell line (**S1 Fig**). These viruses also cause cell death as judged by visual  
193 evidence of cytopathic effects (CPE) in infected cell culture (**Fig 1B**). In contrast, only the  
194 US/MO/47 could replicate in the SH-SY5Y neuronal cell line, reaching peak titers of  $\sim 10^5$   
195 TCID<sub>50</sub>/ml by 48 hours post-infection (hpi). US/TN and VR1197 did not show any signs  
196 of replication, with titers not exceeding background after 96 hpi (**Fig 1A**). Similarly, CPE  
197 was observed after infection of SH-SY5Y cells with US/MO/47, but not with US/TN or

198 VR1197 (**Fig 1B**). Similar results were seen at MOIs of 0.01 and 1.0 (**S2 Fig**).  
199 Furthermore, multiple passages of US/TN or VR1197 infected-supernatant onto fresh SH-  
200 SY5Y cells (passaging every 4 days for 12 days) failed to produce CPE. No increase in  
201 viral titers above background levels was detected by any virus following infection of  
202 HTB10.

203

#### 204 **Immunofluorescence confirms US/MO/47 replication in SH-SY5Y cells**

205 We also examined production of the virus VP1 protein during infection of HeLa and SH-  
206 SY5Y cells. VP1 is among the initial proteins expressed following picornavirus infection,  
207 preceding capsid assembly [42]. We examined the ability of US/MO/47, US/TN and  
208 VR1197 viruses to synthesize the VP1 capsid protein 18 hpi using immunofluorescence.  
209 VP1 protein was detected in cells following infection of HeLa cells with all three EV-D68  
210 strains (**Fig 1C**). However, only the US/MO/47 isolate produced VP1 following infection  
211 of the SH-SY5Y neuronal cell line (**Fig 1C**), which is consistent with our data on viral  
212 replication and CPE (**Fig 1A and 1B**). Also consistent with the viral replication  
213 experiments, no VP1 was produced by any of the three strains when HTB10 cells were  
214 infected. As typically observed in picornaviruses, VP1 staining was observed in the  
215 cytoplasm and not the nucleus of both HeLa and SH-SY5Y cells.

216

#### 217 **Intramuscular virus injection of neurotropic EV-D68 causes paralysis in neonatal** 218 **mice**

219 US/MO/47, US/TN, and VR1197 were assessed *in vivo* for their ability to cause paralysis  
220 and neuropathogenesis in two-day-old outbred Swiss Webster mouse pups as previously

221 described in Hixon *et. al* [21]. Intramuscular injection of US/MO/47 resulted in limb  
222 paresis and paralysis in all mice injected (n=10) as quantified by a Motor Impairment  
223 Score (**Fig 2A**) Materials. Most mice injected with US/MO/47 developed moderate to  
224 severe paralysis in both rear limbs. Paralysis always began in the injected hind limb and  
225 then spread to the contralateral hind limb in most animals, with rare spread of paralysis  
226 to the fore limbs. Quantification of the average motor impairment over time showed onset  
227 of weakness starting at approximately 4 days post-infection (dpi) with progressive  
228 worsening through 7 dpi, with the majority of mice continuing to have moderate to severe  
229 weakness in both hind limbs through the end of the observation period at 14 dpi. These  
230 data are consistent with previously published results on EV-D68-induced paralysis [21,  
231 43]. In contrast to US/MO/47, mice receiving intramuscular injection of US/TN (n=11) or  
232 VR1197 (n=10) failed to develop any signs of motor impairment during the two-week  
233 observation period.

234

### 235 **Neurotropic EV-D68 can be detected in the spinal cords of paralyzed mice**

236 Intramuscular infection with US/MO/47 resulted in increased titers of infectious virus  
237 within mouse spinal cords paralleling the onset of motor impairment. Viral replication was  
238 first detected at 2 dpi in spinal cords ( $\sim 10^3$  TCID<sub>50</sub>/spinal cord), which corresponded with  
239 a rapid increase in viral titer within the muscle tissue ( $\sim 10^5$  TCID<sub>50</sub>/mg) of the injected limb  
240 (**Fig 2B**). Viral titer remained detectable in both spinal cords ( $\sim 10^3$  TCID<sub>50</sub>/spinal cord)  
241 and muscle tissue ( $\sim 10^4$  TCID<sub>50</sub>/mg) at 6 dpi in US/MO/47-injected mice. In contrast,  
242 neither US/TN or VR1197 produced detectable infection within mouse spinal cords. We  
243 observed sustained viral titers from US/TN within mouse muscle up to 6 dpi ( $\sim 10^3$

244 TCID<sub>50</sub>/mg), but no detectable spread of virus to spinal cord. VR1197 did not produce a  
245 sustained infection in mouse muscle, and viral titer dropped to the limits of detection by 6  
246 dpi.

247

### 248 **Replication kinetics of recently circulating EV-D68 strain in SH-SY5Y cell culture** 249 **model**

250 To further characterize the differential replication observed for diverse contemporary EV-  
251 D68 isolates, and to test the SH-SY5Y cell infection mode, we obtained all additional  
252 commercially available strains of EV-D68. These included strains from the B1, B2, and  
253 D1 clades. Interestingly, all additional viral strains replicated in both HeLa and SH-SY5Y  
254 (**3A Fig**), including another strain from the B1 clade, US/MO/49, a strain from the newly  
255 defined D1 clade (US/KY), and a strain from the B2 clade (US/IL), replicating to a viral  
256 titer of ~10<sup>5</sup> TCID<sub>50</sub>/ml by 48 hpi. These three strains showed CPE after infection of SH-  
257 SY5Y cells (**3D Fig**). All EV-D68 strains replicated at similar rates in HeLa cells.

258

259 To validate our qualitative CPE evaluation, we performed an independent assay of cell  
260 death using ATP content as determined by CellTiter Glo luminescence assay (Promega)  
261 as a surrogate for viable, intact cells. Using a MOI of 0.1, cell viability dropped after 12  
262 hpi when HeLa cells were infected with every EV-D68 strain tested and continued to drop  
263 until the limit of detection was reached, between 48 and 72 hpi (**Fig 3B**). In contrast, cell  
264 viability of infected SH-SY5Y cells, beginning at approximately 48 hpi, only dropped for  
265 strains where CPE was present. The results of the cell viability and CPE assays was  
266 reflective of the TCID<sub>50</sub> data in HeLa and SH-SY5Y cells for the new panel. The cell

267 viability assay was also performed at 37°C, which produced a similar replication pattern  
268 despite initial reports that EV-D68 grows poorly at 37°C [44]. We observed similar rates  
269 of viral replication in HeLa and SH-SY5Y cells at both 33°C and 37°C (**S3 Fig**).

270

### 271 **Human Rhinovirus does not infect SH-SY5Y**

272 SH-SY5Y cells were tested for infectivity across a broad selection of HRV strains: two  
273 strains from the HRV-B lineage (HRV-B6 and HRV-B14) and four strains from the HRV-  
274 A lineage (HRV-A95, HRV-A50, HRV-A36 and HRV-A20). Using the cell viability assay  
275 with a MOI of 0.1, the number of viable cells dropped for all HRV strains in HeLa cells.  
276 However, in SH-SY5Y cells, no evidence of HRV infectivity was observed for any strain  
277 tested using either the cell viability assay (**Fig 3C**) or visual inspection for CPE (**S4 Fig**).

278

### 279 **Differential infection by EV-D68 viral strains is the same in differentiated and** 280 **undifferentiated SH-SY5Y cells and in primary human neurons**

281 To further characterize the differential replication capability of different EV-D68 strains,  
282 we differentiated SH-SY5Y using a well-established retinoic acid (RA) treatment protocol  
283 [45, 46], before virus infection, and confirmed differentiation by microscopic examination  
284 for morphological changes. We observed no difference in EV-D68 infectivity pattern  
285 between differentiated and undifferentiated SH-SY5Y cells. CPE observation and viral  
286 replication rate (**S5 Fig**) were similar compared to undifferentiated SH-SY5Y for all  
287 strains. All strains that could replicate in undifferentiated SH-SY5Y could also replicate  
288 in differentiated SH-SY5Y cells, and viral strains that could not replicate also did not  
289 replicate in differentiated SH-SY5Y cells. This demonstrates that EV-D68 strains are

290 capable of infecting neuronal precursors and can also infect mature differentiated  
291 neuronal cells. Primary human fetal brain-derived neurons were cultured and infected  
292 with US/TN, VR1197 and US/MO/47 (**S6 Fig**). Neurotropic and non-neurotropic EV-D68  
293 strains showed the same infectivity pattern in SH-SY5Y. Using a MOI of 0.01, US/TN  
294 and VR1197 plated onto primary neuronal cells did not replicate and viral titers did not  
295 rise above the inoculation level baseline. In contrast, an increase in viral titers was  
296 observed when the neurotropic strain US/MO/47 infected primary neuronal cells and  
297 reached peak titer  $\sim 10^5$  TCID<sub>50</sub>/ml at 24 hpi.

298

#### 299 **All EV-D68 strains generate virus when transfected into SH-SY5Y cells**

300 To determine if virus cell entry may be responsible for restricting virus replication in SH-  
301 SY5Y for some isolates, full-length genomic RNA from each of the EV-D68 isolates was  
302 transfected into the cytoplasm of SH-SY5Y cells and virus production was measured.  
303 RNA transfection into HeLa cells resulted in a viral infection and replication pattern similar  
304 to intact virus infections at a MOI of 0.1, with viral titers peaking at  $\sim 10^7$  TCID<sub>50</sub>/ml for all  
305 EV-D68 strains tested. In contrast to what we observed using standard infection assays,  
306 all tested D68 strains generated virus following RNA transfection into SH-SY5Y cells.  
307 However, the viral titer peaked at  $10^4$  TCID<sub>50</sub>/ml 48 hours after transfection of SH-SY5Y  
308 for viral strains that could not infect SH-SY5Y cells using intact virions (**Fig 4**), whereas  
309 the viral titer continued to increase until saturation at approximately  $10^7$  TCID<sub>50</sub>/ml  
310 following transfection of SH-SY5Y with strains that could infect SH-SY5Y cells.

311

312

## 313 Discussion

314

315 Here we report on the differential infectivity between various contemporary and historical  
316 EV-D68 strains in SH-SY5Y as measured by viral replication, cell viability, CPE, and  
317 immunofluorescence. The clade specificity of neuropathogenesis previously reported  
318 [10, 22, 25-27, 32, 33] between contemporary and historical strains is observed in the  
319 neurotropism in SH-SY5Y cells (**Figure 5**). Among the EV-D68 strains used in this study,  
320 those from clades B1, B2 and D1 were able to infect SH-SY5Y cells and cause paralysis  
321 in a mouse model, whereas those from clade A and other historical strains could not [47].  
322 We also showed that this differential growth is at least partly due to differential viral entry,  
323 as all strains can replicate and produce viral progeny after transfection.

324

325 To determine the most appropriate tissue culture model system, we explored the gene  
326 expression by RNA sequencing and showed that transcripts from SH-SY5Y cells are  
327 enriched for neuronal-specific genes relative to HeLa and HTB10 cells. This agrees with  
328 several other groups which have shown the expression of specific neurological marker  
329 genes in SH-SY5Y cells [45, 48, 49]. This neuronal cell line has successfully been used  
330 as a model to study the *in vitro* neuropathogenic effects of different viruses, notably, as a  
331 model for paralytic enteroviral isolates including EV-A71 and poliovirus [35, 50-56].  
332 Numerous other viruses associated with neurological symptoms can infect SH-SY5Y,  
333 including: Japanese encephalitis-virus [57], human immunodeficiency-virus [58], human  
334 cytomegalovirus [59], varicella-zoster virus [60], chikungunya [61], mumps virus [62],

335 dengue virus [63], Zika virus [64, 65], and rabies virus [66] suggesting that SH-SY5Y is  
336 an excellent model system for neurotropic viruses.

337

338 We found support of the biological relevance of SH-SY5Y cells as a cell culture model by  
339 observing the same infectivity pattern *in vitro* with other neuronal cell cultures. SH-SY5Y  
340 cells are capable of being differentiated using retinoic acid, which leads to more neuron-  
341 specific morphology and gene expression. These differentiated cells are characterized  
342 by the formation of extensive neurites, as well as the induction of neuron-specific  
343 enzymes, receptors and neurotransmitters [45]. Differentiated SH-SY5Y cells have been  
344 used as models for neuron-virus interactions [67] including EV-A71 [55, 56],  
345 Chikungunya virus [61], and varicella-zoster virus [60]. Our results show that both  
346 differentiated and undifferentiated SH-SY5Y can be infected with neurotropic strains of  
347 EV-D68, suggesting neurotropic strains of EV-D68 can invade both immature and mature  
348 neuronal cells. Primary human fetal brain-derived neurons have also been used to study  
349 infectivity patterns of neurotropic viruses as well as the central nervous system [68, 69].  
350 We also observed a similar EV-D68 replication pattern in human primary postnatal  
351 neurons. Interestingly, despite initially reported as growing poorly at 37°C [44], we  
352 observed similar rates of EV-D68 replication in SH-SY5Y cells at both 33°C and 37°C,  
353 which would likely be a more biologically relevant temperature for paralytic infections at  
354 the core body temperature rather than the lower temperature of the upper respiratory  
355 system that supports more routine respiratory infection.

356



357 EV-D68 is closely related to human rhinovirus (HRV) within the *Picornaviridae* family [70].  
358 Frequent coinfection in patients and cross-reactivity of nucleic acid amplification  
359 screening had led to misdiagnosis of EV-D68 infection as HRV infection prior to the 2014  
360 outbreak [71, 72]. Despite the similarity in respiratory symptoms, HRV lacks any  
361 association with the neurological symptoms of other enteroviruses, such as EV-D68 and  
362 EV-A71 [70]. Indeed, despite their similarity to EV-D68, none of the 6 HRV strains could  
363 infect SH-SY5Y cells.

364

365 We hypothesized that the reason for differential replication in SH-SY5Y cells of EV-D68  
366 strain relates to different viral entry capabilities. We used RNA transfection to deliver  
367 infectious RNA to the cytoplasm, bypassing natural viral entry mechanisms during an  
368 infection. All EV-D68 strains generated virus following RNA transfection, but in some  
369 cases viral titers plateaued at a relatively lower level, suggesting that only a single round  
370 of replication had occurred. HRV RNA transfected into SH-SY5Y cells produced a similar  
371 result. Our interpretation is that differences in the sequence and structure of viral capsid  
372 proteins are responsible for the differential infectivity in SH-SY5Y cells by EV-D68 strains,  
373 and that viral entry is what prevents HRV, US/TN, and the historical strains from infecting  
374 SH-SY5Y cells. It has recently been reported that a chimeric swap mutant exchanging  
375 the viral capsid from EV-D68 VR1197 and a neurotropic EV-D94 strain capable of  
376 replication in SH-SY5Y cells, results in a loss on infectivity in SH-SY5Y cells [47]. This  
377 result further supports our conclusion that viral entry mediated by the capsid is the cause  
378 of the observed differential neurotropism. Specific genetic residues may be the cause of  
379 differential neurotropism. A comparative analysis using infectious clones bearing specific

380 polymorphisms will likely be needed to establish the determinants of neurotropism in SH-  
381 SY5Y. In particular, the 2014 outbreak B1 substitutions in VP1/98A, VP1/148V,  
382 VP1/280K, VP1/290S, VP1/308N, and VP2/222T are all located on the virion surface and  
383 could be directly involved in virus-host cell attachment and would be good candidates to  
384 evaluate.

385

386 Our results closely correlate with the differential paralytic myelitis caused by EV-D68 in  
387 mice suggesting that infectivity in SH-SY5Y cells may be an effective proxy for  
388 neuropathogenesis (**Figure 5**). Multiple contemporary EV-D68 strains that have been  
389 shown to cause paralytic myelitis in mice were also neurotropic in SH-SY5Y cells [21].  
390 The historical, non-neurotropic strains that are nonparalytic in mice did not grow in SH-  
391 SY5Y cells. In particular, the contemporary EV-D68 strain, US/TN, which was non-  
392 neurotropic in SH-SY5Y cells and not previously reported in *Hixon et al.* failed to produce  
393 paralysis in mice and could not be found in mouse spinal cord tissue. US/TN appeared  
394 to replicate at a low level within mouse muscle tissue, indicating lack of paralysis was not  
395 due to an inability to infect the mice. The infectivity pattern in SH-SY5Y cells, along with  
396 the agreement in primary postnatal neurons, supports the mouse model reported in *Hixon*  
397 *et al.* [21] and validates the results in the SH-SY5Y human cell line. This is significant  
398 because, while useful, mouse models are costly and introduce potential caveats, such as  
399 transcriptional factor differences in mice versus humans [73-75] and is debated if the  
400 mouse model recapitulates human conditions [76, 77]. Evidence presented here  
401 supports the validity of the mouse model for further study of neurotropic EV-D68 viruses  
402 and the theory of a causal link between AFM in humans and EV-D68.

403 **Conclusion**

404 We present a differential neuronal infectivity phenotype between contemporary and  
405 historical EV-D68 strains. Permissible infection of SH-SY5Y cells mimics the paralysis  
406 pattern reported in animal models. The high throughput nature of tissue culture models  
407 will allow for rapid screening of novel viral strains and recombinant viruses to elucidate  
408 the genetic determinants of neurotropism and potential antiviral therapies. This can  
409 enable identification of EV-D68 alleles responsible for neural infection and potentially  
410 neurological disease and avoids the cost associated with large-scale screening using  
411 animal models.

## 412 **Materials and Methods**

### 413 **Ethics Statement**

414 All studies were done in accordance with the University of Colorado IACUC and Animal  
415 Use Committee (B-34716(03)1E). Mice were cared for in adherence to the National  
416 Institute of Health (NIH) guidelines to the Care and Use of Laboratory Mice. Mouse pups  
417 exhibiting paralysis were euthanized if unable to nurse. Mice were anaesthetized with  
418 inhaled isoflurane before tissue collection or perfusion.

419

### 420 **Cell culture**

421 HeLa cells (ATCC) were maintained in Dulbecco's modified Eagle's medium (DMEM,  
422 Gibco) supplemented with 10% fetal bovine serum (FBS, HyClone). HTB10 (ATCC) cells  
423 were maintained in DMEM supplemented with 10% FBS and non-essential amino acids  
424 (Gibco). SH-SY5Y (CLR-2266, ATCC) cells were maintained in a 1:1 mixture of DMEM  
425 and F12 (Gibco) media supplemented with 10% FBS. To differentiate SH-SY5Y cells, a  
426 ~50% confluent flask of SH-SY5Y cells had media replaced with 1:1 mixture of DMEM  
427 and F12 (Gibco) media supplemented with 3% FBS and 10  $\mu$ M retinoic acid (RA, Sigma)  
428 [53]. After 3 d of exposure to RA, the morphology of cells was evaluated, and cells were  
429 passaged for further use. Morphology and cytopathic effect was evaluated using an  
430 inverted microscope. Human postnatal day 0 (P0) brain neurons were purchased from  
431 ScienCell (Cat# 1520) and plated at a density of 40,000 neurons/well on poly-D-lysine  
432 coated 96-well plates [69]. The neurons were maintained in ScienCell neuronal growth  
433 media with penicillin-streptomycin (Cat# 1520) at 37°C in 5% CO<sub>2</sub> until day in vitro (DIV)  
434 7, by which time the neurons had well-established neurites.

435

436 **Virus Stock Preparation**

437 EV-D68 stocks were prepared by infecting HeLa or rhabdomyosarcoma cells (ATCC) at  
 438 33°C in 5% CO<sub>2</sub> until CPE was observed. Cell debris was removed by centrifugation and  
 439 titers determined in a standard Tissue Culture Infective Dose (TCID<sub>50</sub>) assay and  
 440 calculated by the Spearman-Kärber method. The source of each strain is detailed in (**S1**  
 441 **table**)

442 **S1 Table: List of strains used in this study.**

| Species            | Strain name           | Abbreviation | D68 clade | Accession # | Source              |
|--------------------|-----------------------|--------------|-----------|-------------|---------------------|
| Enterovirus D68    | USA/N0051U5/2012      | US/TN        | A         | KT347280    | Dr. Tina V. Hartert |
| Enterovirus D68    | US/MO/14-18947        | US/MO/47     | B1        | KM851225    | ATCC VR-1823        |
| Enterovirus D68    | ATCC VR-1197          | VR-1197      | Fermon    | KT725431    | ATCC VR-1197        |
| Enterovirus D68    | US/IL/14-18952        | US/IL        | B2        | KM851230    | ATCC VR-1824        |
| Enterovirus D68    | US/KY/14-18953        | US/KY        | D1        | KM851231    | ATCC VR-1825        |
| Enterovirus D68    | US/MO/14-18949        | US/MO/49     | B1        | KM851227    | BEI NR-49130        |
| Human Rhinovirus A | 15-CV19               | HRV-A20      | N/A       | JN614993    | ATCC VR-495         |
| Human Rhinovirus A | SF-998                | HRV-A95      | N/A       | FJ445170    | ATCC VR-1301        |
| Human Rhinovirus A | A2#58                 | HRV-A50      | N/A       | FJ445135    | ATCC VR-517         |
| Human Rhinovirus A | 342 H [V-171-001-021] | HRV-A36      | N/A       | JF781497    | ATCC VR-1146        |
| Human Rhinovirus B | 1059                  | HRV-B14      | N/A       | NC_001490   | ATCC VR-284         |
| Human Rhinovirus B | Thompson              | HRV-B6       | N/A       | JN614996    | ATCC VR-486         |

443

444

445 **Replication kinetics of EV-D68.**

446 The replication kinetics for HeLa, A549, HTB10, SH-SY5Y and differentiated SH-SY5Y  
447 cell were evaluated in a high throughput manner. Viral replication kinetics were measured  
448 from sets of flat bottom 96-well plates. Sets of plates corresponding to the number of  
449 desired timepoints in an experiment were infected at the same initial time, using distinct  
450 96-well plates for each time point. Infected plates were incubated at 33-34°C, 5% CO<sub>2</sub>  
451 until the designated time point when each corresponding plate was placed in a -80°C  
452 freezer until the entire time course was completed. Mock infected wells adjacent to each  
453 condition demonstrated that no contamination occurred across wells. After 2 h, high MOI  
454 conditions (0.1 and 1) were washed three times with phosphate buffered saline (PBS)  
455 and the 2 h time point plate frozen to determine the background levels of virus present,  
456 since 2 h is long enough for EV-D68 entry but not long enough for replication. After three  
457 freeze-thaw cycles the viral titers from 10-fold serial dilutions of each sample were  
458 evaluated using a 50% TCID<sub>50</sub> assay on HeLa cells. Plates were scored after adding 100  
459 µl of crystal violet fixative per well followed by a 1 h incubation at room temperature (RT)  
460 and washing to remove unbound dye. Crystal violet fixative was prepared by adding 5 g  
461 crystal violet (sigma) and 8.5 g sodium chloride (Sigma) to 50 ml formaldehyde, 260 ml  
462 ethanol, and 690 ml deionized water.

463

464 For replication kinetics in human postnatal neurons, day in-vitro (DIV) 7 neurons were  
465 infected with EV-D68 US/MO/47, US/TN, or VR1197 at a MOI = 0.01. Infection media  
466 was left on the cells for the duration of the experiment to minimize loss of cells from  
467 multiple rinses due to low cell adhesion. Cell culture supernatant and lysate was collected

468 at 0, 6, 12, 24, 48, and 72 h, with three biological replicates collected per time point for  
469 each viral strain. Lysate was serially-diluted 10-fold from 1 (raw lysate) to  $10^{-6}$  RD cells at  
470 33°C and evaluated using a 50% TCID<sub>50</sub> assay.

471

## 472 **Immunostaining**

473 HeLa and SH-SY5Y cells were grown to 50-70% confluence on coverslips in a 24-well  
474 plate and infected with EV-D68 strains at a MOI of 1.0. Mock infected cells serve as a  
475 negative control. Coverslips were incubated at 34°C, 5% CO<sub>2</sub> for 18 hours, then fixed  
476 with 4% paraformaldehyde (PFA) and stored at 4°C. The coverslips were washed with  
477 PBS and cells were permeabilized with 0.1% Triton-X for 10 minutes. The coverslips  
478 were blocked with 2% bovine serum albumin in PBS for 1 hour. The cells were incubated  
479 with rabbit polyclonal  $\alpha$ -VP1 of EV-D68 (GeneTex) at a final concentration of 4  $\mu$ g/ml  
480 overnight at 4°C, washed 3 times, and then incubated with a secondary goat  $\alpha$ -rabbit  
481 rhodamine red-X (Thermo Fisher) at a final concentration of 1  $\mu$ g/ml for 30 minutes. To  
482 visualize nuclei, DAPI stain was added to the second of three washes. The wells were  
483 visualized on an Axioskop 2 plus (Zeiss) fluorescence microscope using DAPI and  
484 Rhodamine filters. Images were taken with AxioCam MRc5 (Zeiss) camera using  
485 AxioVision software. All images for a particular filter were taken under identical exposure  
486 conditions.

487

## 488 **Mouse Infections with EV-D68**

489 Animal experiment were performed in an AAALAC accredited animal facility under IACUC  
490 protocol B-34716(03)1E at the University of Colorado. Pregnant female Swiss Webster

491 mice were ordered from Envigo and kept in standard housing until the pups were born.  
492 At post-natal day 2, the dam and pups were transferred the BioSafety Level 2 (BSL2)  
493 region of the animal facility. P2 Swiss Webster mouse pups were then inoculated with  
494  $10^{6.8}$  TCID<sub>50</sub>/ml virus in 10 ul by intramuscular injection into the left medial hindlimb [21].  
495 Mouse pups of both sexes were randomized to treatment conditions before virus  
496 inoculation.

497

### 498 **Motor Impairment Scoring**

499 Mice were monitored daily for 14 days. To assess paralysis, mice were removed from the  
500 cage and observed moving on a flat surface for several minutes in which each limb was  
501 given a motor impairment score: 0 - no motor impairment; 1 - mild motor impairment,  
502 ataxia or decreased movement present, toe/knuckle walking; 2 - moderate impairment,  
503 profound ataxia, limited movement of limb; 3 - severe impairment, no movement in limb,  
504 limb is non-weight bearing. The final motor impairment score for each day was achieved  
505 by summing the score for each limb.

506

### 507 **Mouse tissue collection**

508 Mouse pups were sacrificed by decapitation for collection of muscle and spinal cord  
509 tissue. Spinal cords were removed as previously described [21, 43]. Muscle tissue was  
510 collected from the inoculated limb (with the goal of obtaining as much muscle tissue  
511 possible from the anterior and posterior thigh and gastrocnemius). Both tissues were  
512 collected into BeadBug tubes containing inert ceramic bead and 0.3 mL of ice-cold, sterile  
513 PBS. Tissues were lysed mechanically on a BeadBug tissue homogenizer for 45 seconds



514 at 2800 rpm, and stored at  $-80^{\circ}\text{C}$ . After thaw, tissue samples were spun at  $2700\times g$  for 1  
515 minute to remove tissue chunks from the lysate. Lysate was serially-diluted 10-fold from  
516 1 (raw lysate) to  $10^{-6}$  and plated in a standard TCID<sub>50</sub> assay to determine the final viral  
517 titer. To get the final titer per whole spinal cord, TCID<sub>50</sub>/mL was multiplied by 0.3 mL. To  
518 get the final muscle titer per milligram of tissue, TCID<sub>50</sub>/mL was multiplied by 0.3 mL and  
519 divided by the weight of tissue collected. Samples that were below the limit of detection  
520 were graphed at zero.

### 521 **Cell ATP/viability assay.**

522 Cells were cultured and evaluated in the same manner as in the viral replication kinetics  
523 assays. ATP levels were measured using the CellTiter-Glo luminescent cell viability  
524 assay kit (catalog number G7570; Promega), and cell viability calculated relative to mock  
525 control. To preserve the ATP levels so that each timepoint could be evaluated  
526 concurrently, cell supernatant was removed and cells frozen at  $-80^{\circ}\text{C}$ . Once the time  
527 series was completed, all plates were removed and RT media was added to each plate.  
528 Upon stabilization at RT for 20 min, the manufactures protocol was followed. We  
529 validated this deviation from the manufactures protocol by confirming the linearity of the  
530 assay across the active range of the study.

531

### 532 **RNA sequencing**

533 In order to explore the use of SH-SY5Y as an appropriate neuronal cell model, we used  
534 RNA sequencing to obtain a comprehensive view of the genes expressed in SH-SY5Y,  
535 HeLa and HTB10 cell lines. To prepare cells for RNA sequencing  $10^4$  cells were grown  
536 in a 96 well plate for 24 h in quadruplicate before washing and resuspension in  $10\ \mu\text{l}$  of

537 Cell Lysis Buffer (0.2% Triton X-100, 2 Units/ $\mu$ L RNase inhibitor, 1:2,000,000 dilution of  
538 ERCC spike-in RNAs (Life Technologies)) per well. Full length cDNA was amplified using  
539 the SmartSeq2 protocol optimized in our laboratory [78, 79] before Nextera XT library  
540 preparation and sequencing on a NextSeq500 with 2 x 150 paired end reads. After  
541 adapter/primer trimming using the Trimmomatic tool  
542 (<http://www.usadellab.org/cms/?page=trimmomatic>), trimmed sequencing reads were  
543 mapped to transcripts derived from the human reference genome (GRCh37) and gene  
544 expression levels (transcripts per million reads) estimated using the RSEM package [80].

545

#### 546 **RNA purification and transfection**

547 RNA used for transfections was purified from viral stocks grown in HeLa cells. Purification  
548 was performed using QIAamp MinElute Virus Spin Kit (Qiagen) according to the  
549 manufacturer's instructions; final RNA concentrations were approximately 100 ng/ $\mu$ L. In  
550 12-well plates selected cell cultures were seeded and grown. According to the  
551 manufacturer's instructions, 200 ng of RNA was used with 2  $\mu$ L of each reagent in the  
552 *TransIT*<sup>®</sup>-mRNA transfection kit (Mirus) to perform a transfection.

553

#### 554 **Acknowledgements**

555 We thank Dr. Tina V. Hartert and her colleagues at Vanderbilt for US/TN EV-D68 strain.

556

#### 557 **Figures Legends**

558

559 **Fig 1. Differential infection and replication of EV-D68 strains in SH-SY5Y.** A) SH-  
560 SY5Y, HTB10, and HeLa were grown to 90% confluence in 96-well plates before infection  
561 with EV-D68 US/MO/47, US/TN and VR1197 at a MOI = 0.1. Infection media was  
562 removed 2 hours post-infection (hpi) to reduce background. Cell culture lysates were  
563 collected at various time points after infection, and viral titers measured using endpoint  
564 dilutions for growth in HeLa cells. Dotted black line indicates the limit of detection. Error  
565 bars represent SEM of three biological replicates. B) SH-SY5Y, HTB10, and HeLa were  
566 infected with EV-D68 US/MO/47, US/TN and VR1197 at an MOI = 0.1 as above. Cells  
567 were visualized at 72 hpi with bright field microscopy at 400x. C) HeLa and SH-SY5Y cell  
568 lines were infected with the indicated EV-D68 strains at a MOI of 1.0. Cells were fixed at  
569 18 hpi and stained with polyclonal antiserum against EV-D68 VP1 (red) and  
570 counterstained with DAPI (blue) for nuclei detection.

571  
572 **Fig 2. Differential motor impairment in mice following intramuscular injection.** A)  
573 Motor impairment was scored daily for 14 days post-intramuscular challenges with the  
574 indicated EV-D68 strains. None of the mice infected with US/TN or VR1197 mice  
575 developed signs of paralysis, whereas 100% of mice infected with US/MO/47 developed  
576 paralysis. Error bars represent standard error of the mean. B) Viral titers from muscle and  
577 spinal cord titers were determined by TCID<sub>50</sub> assay on samples taken at 0, 2, 4, and 6  
578 days post-intramuscular infection. Error bars represent the standard deviation.

579  
580 **Fig 3. An expanded set of contemporary EV-D68 strains infect SH-SY5Y, but HRV**  
581 **strains do not.** A) HeLa and SH-SY5Y cells were infected with 6 different EV-D68 isolates

582 at a MOI of 0.1. Cell culture lysates were collected at various time points and viral titer  
583 determined by TCID<sub>50</sub> in HeLa cells. Dotted black lines indicate the limit of detection.  
584 Error bars represent SEM of three biological replicates. B) Similarly, cell viability was  
585 determined by quantifying the ATP content of the supernatant with CellTiter Glo  
586 (Promega) luminescence. Cell viability was calculated relative to mock-infected cultures.  
587 Error bars represent SEM of three replicates. C) Six different human rhinovirus (HRV)  
588 strains and two EV-D68 strains were used to infect HeLa and SH-SY5Y cell cultures at a  
589 MOI of 0.1 and were visualized at 72 hpi. Cell viability was calculated as above. D)  
590 Differential cytopathic effects of different EV-D68 isolates in HeLa and SH-SY5Y cells  
591 after infection with different EV-D68 isolates at a MOI of 0.1 before visualization at 72 hpi.  
592

593 **Fig 4. Replication of EV-D68 isolates following transfection of genomic RNA into**  
594 **HeLa and SH-SY5Y cells.** RNAs were purified from various HRV and EV-D68 virus  
595 stocks and used to transfect SH-SY5Y and HeLa cells. Cell culture lysates were collected  
596 at various time points and viral titer determined by TCID<sub>50</sub> in HeLa cells. Error bars  
597 represent SEM of three biological replicates.

598  
599 **Fig 5. Phylogenetic tree of EV-D68 isolates based on VP1 sequences.** VP1 nucleotide  
600 sequences of > 900 nt were retrieved from the ViPR site  
601 ([https://www.viprbrc.org/brc/home.spg?decorator=picorna\\_entero](https://www.viprbrc.org/brc/home.spg?decorator=picorna_entero)) on July 24, 2017.  
602 Sequences were aligned using the MUSCLE algorithm and sequences showing poor  
603 alignments were removed. A phylogenetic tree was computed using RaXML (bootstrap  
604 replicates of 100) and then visualized using Archaeopteryx.js, via the ViPR site. Clade

605 classifications are based on bootstrap values of 100%. AFM-associated isolates are  
606 marked with a green arrow. EV-D68 isolates used in this study are labeled either with a  
607 pink (growth in SH-SY5Y cells) or orange (no growth in SH-SY5Y cells) arrow. Isolates  
608 that are paralytogenic in mice (56) are labeled with a blue arrow.

609

## 610 **References**

611

- 612 1. Pallansch MA, Sandhu HS. The eradication of polio--progress and challenges. *The New England*  
613 *journal of medicine*. 2006;355(24):2508-11. Epub 2006/12/15. doi: 10.1056/NEJMp068200.  
614 PubMed PMID: 17167133.
- 615 2. CDC. AFM in the United States 2018 [cited 2018 March 20th 2018]. Available from:  
616 <https://www.cdc.gov/acute-flaccid-myelitis/afm-surveillance.html>.
- 617 3. CDC. Epidemiology and Prevention of Vaccine-Preventable Diseases: National Center for  
618 Immunization and Respiratory Diseases; 2015 [cited 2018 April 30th 2018]. Available from:  
619 <https://www.cdc.gov/vaccines/pubs/pinkbook/polio.html>.
- 620 4. Schieble JH, Fox VL, Lennette EH. A probable new human picornavirus associated with  
621 respiratory diseases. *American journal of epidemiology*. 1967;85(2):297-310. Epub 1967/03/01.  
622 PubMed PMID: 4960233.
- 623 5. Khetsuriani N, Lamonte-Fowlkes A, Oberst S, Pallansch MA. Enterovirus surveillance--United  
624 States, 1970-2005. *Morbidity and mortality weekly report Surveillance summaries* (Washington,  
625 DC : 2002). 2006;55(8):1-20. Epub 2006/09/15. PubMed PMID: 16971890.
- 626 6. Imamura T, Oshitani H. Global reemergence of enterovirus D68 as an important pathogen for  
627 acute respiratory infections. *Rev Med Virol*. 2015;25(2):102-14. doi: 10.1002/rmv.1820. PubMed  
628 PMID: 25471236; PubMed Central PMCID: PMC4407910.
- 629 7. Sejvar JJ, Lopez AS, Cortese MM, Leshem E, Pastula DM, Miller L, et al. Acute Flaccid Myelitis  
630 in the United States, August-December 2014: Results of Nationwide Surveillance. *Clin Infect*  
631 *Dis*. 2016;63(6):737-45. doi: 10.1093/cid/ciw372. PubMed PMID: 27318332.
- 632 8. Holm-Hansen CC, Midgley SE, Fischer TK. Global emergence of enterovirus D68: a systematic  
633 review. *The Lancet Infectious Diseases*. 2016;16(5):e64-e75. doi: 10.1016/s1473-3099(15)00543-  
634 5.
- 635 9. Ayscue P, Van Haren K, Sheriff H, Waubant E, Waldron P, Yagi S, et al. Acute flaccid paralysis  
636 with anterior myelitis - California, June 2012-June 2014. *MMWR Morbidity and mortality*  
637 *weekly report*. 2014;63(40):903-6. Epub 2014/10/10. PubMed PMID: 25299608.
- 638 10. Greninger AL, Naccache SN, Messacar K, Clayton A, Yu G, Somasekar S, et al. A novel  
639 outbreak enterovirus D68 strain associated with acute flaccid myelitis cases in the USA (2012-  
640 14): a retrospective cohort study. *The Lancet Infectious Diseases*. 2015;15(6):671-82. doi:  
641 10.1016/s1473-3099(15)70093-9.
- 642 11. Messacar K, Schreiner TL, Van Haren K, Yang M, Glaser CA, Tyler KL, et al. Acute flaccid  
643 myelitis: A clinical review of US cases 2012-2015. *Ann Neurol*. 2016;80(3):326-38. doi:  
644 10.1002/ana.24730. PubMed PMID: 27422805; PubMed Central PMCID: PMC45098271.
- 645 12. Messacar K, Schreiner TL, Maloney JA, Wallace A, Ludke J, Oberste MS, et al. A cluster of  
646 acute flaccid paralysis and cranial nerve dysfunction temporally associated with an outbreak of

- 647 enterovirus D68 in children in Colorado, USA. *The Lancet*. 2015;385(9978):1662-71. doi:  
648 10.1016/s0140-6736(14)62457-0.
- 649 13. Messacar K, Abzug MJ, Dominguez SR. 2014 outbreak of enterovirus D68 in North America. *J*  
650 *Med Virol*. 2016;88(5):739-45. doi: 10.1002/jmv.24410. PubMed PMID: 26489019.
- 651 14. Ng TF, Montmayeur A, Castro C, Cone M, Stringer J, Lamson DM, et al. Detection and Genomic  
652 Characterization of Enterovirus D68 in Respiratory Samples Isolated in the United States in 2016.  
653 *Genome Announc*. 2016;4(6). doi: 10.1128/genomeA.01350-16. PubMed PMID: 27932649;  
654 PubMed Central PMCID: PMC5146441.
- 655 15. Lang M, Mirand A, Savy N, Henquell C, Maridet S, Perignon R, et al. Acute flaccid paralysis  
656 following enterovirus D68 associated pneumonia, France, 2014. *Euro Surveill*. 2014;19(44).  
657 Epub 2014/11/14. PubMed PMID: 25394254.
- 658 16. Bragstad K, Jakobsen K, Rojahn AE, Skram MK, Vainio K, Holberg-Petersen M, et al. High  
659 frequency of enterovirus D68 in children hospitalised with respiratory illness in Norway, autumn  
660 2014. *Influenza Other Respir Viruses*. 2015;9(2):59-63. doi: 10.1111/irv.12300. PubMed PMID:  
661 25534826; PubMed Central PMCID: PMC4353317.
- 662 17. Yea C, Bitnun A, Robinson J, Mineyko A, Barton M, Mah JK, et al. Longitudinal Outcomes in  
663 the 2014 Acute Flaccid Paralysis Cluster in Canada. *J Child Neurol*. 2017;32(3):301-7. doi:  
664 10.1177/0883073816680770. PubMed PMID: 28193112.
- 665 18. Levy A, Roberts J, Lang J, Tempone S, Kesson A, Dofai A, et al. Enterovirus D68 disease and  
666 molecular epidemiology in Australia. *J Clin Virol*. 2015;69:117-21. Epub 2015/07/26. doi:  
667 10.1016/j.jcv.2015.06.079. PubMed PMID: 26209392.
- 668 19. Van Haren K, Ayscue P, Waubant E, Clayton A, Sheriff H, Yagi S, et al. Acute Flaccid Myelitis  
669 of Unknown Etiology in California, 2012-2015. *JAMA*. 2015;314(24):2663-71. doi:  
670 10.1001/jama.2015.17275. PubMed PMID: 26720027.
- 671 20. Maloney JA, Mirsky DM, Messacar K, Dominguez SR, Schreiner T, Stence NV. MRI findings in  
672 children with acute flaccid paralysis and cranial nerve dysfunction occurring during the 2014  
673 enterovirus D68 outbreak. *AJNR Am J Neuroradiol*. 2015;36(2):245-50. doi:  
674 10.3174/ajnr.A4188. PubMed PMID: 25414005.
- 675 21. Hixon AM, Yu G, Leser JS, Yagi S, Clarke P, Chiu CY, et al. A mouse model of paralytic  
676 myelitis caused by enterovirus D68. *PLoS Pathog*. 2017;13(2):e1006199. doi:  
677 10.1371/journal.ppat.1006199. PubMed PMID: 28231269; PubMed Central PMCID:  
678 PMC5322875.
- 679 22. Zhang Y, Cao J, Zhang S, Lee AJ, Sun G, Larsen CN, et al. Genetic changes found in a distinct  
680 clade of Enterovirus D68 associated with paralysis during the 2014 outbreak. *Virus Evol*.  
681 2016;2(1):vew015. doi: 10.1093/ve/vew015. PubMed PMID: 28512577; PubMed Central  
682 PMCID: PMC5426007.
- 683 23. Drake JW. Rates of spontaneous mutation among RNA viruses. *Proc Natl Acad Sci U S A*.  
684 1993;90(9):4171-5. Epub 1993/05/01. PubMed PMID: 8387212; PubMed Central PMCID:  
685 PMC546468.
- 686 24. Lukashev AN, Lashkevich VA, Ivanova OE, Koroleva GA, Hinkkanen AE, Ilonen J.  
687 Recombination in circulating enteroviruses. *J Virol*. 2003;77(19):10423-31. Epub 2003/09/13.  
688 PubMed PMID: 12970427; PubMed Central PMCID: PMC228507.
- 689 25. Gong YN, Yang SL, Shih SR, Huang YC, Chang PY, Huang CG, et al. Molecular evolution and  
690 the global reemergence of enterovirus D68 by genome-wide analysis. *Medicine (Baltimore)*.  
691 2016;95(31):e4416. doi: 10.1097/MD.0000000000004416. PubMed PMID: 27495059; PubMed  
692 Central PMCID: PMC4979813.
- 693 26. Yip CCY, Lo JYC, Sridhar S, Lung DC, Luk S, Chan KH, et al. First Report of a Fatal Case  
694 Associated with EV-D68 Infection in Hong Kong and Emergence of an Interclade Recombinant  
695 in China Revealed by Genome Analysis. *Int J Mol Sci*. 2017;18(5). doi: 10.3390/ijms18051065.  
696 PubMed PMID: 28509856; PubMed Central PMCID: PMC5454976.



- 697 27. Lau SK, Yip CC, Zhao PS, Chow WN, To KK, Wu AK, et al. Enterovirus D68 Infections  
698 Associated with Severe Respiratory Illness in Elderly Patients and Emergence of a Novel Clade  
699 in Hong Kong. *Sci Rep.* 2016;6:25147. doi: 10.1038/srep25147. PubMed PMID: 27121085;  
700 PubMed Central PMCID: PMC4848506.
- 701 28. Xiang Z, Xie Z, Liu L, Ren L, Xiao Y, Paranhos-Baccala G, et al. Genetic divergence of  
702 enterovirus D68 in China and the United States. *Sci Rep.* 2016;6:27800. doi: 10.1038/srep27800.  
703 PubMed PMID: 27278628; PubMed Central PMCID: PMC4899779.
- 704 29. Dyrdak R, Grabbe M, Hammas B, Ekwall J, Hansson KE, Luthander J, et al. Outbreak of  
705 enterovirus D68 of the new B3 lineage in Stockholm, Sweden, August to September 2016. *Euro*  
706 *Surveill.* 2016;21(46). Epub 2016/12/06. doi: 10.2807/1560-7917.es.2016.21.46.30403. PubMed  
707 PMID: 27918255; PubMed Central PMCID: PMC485144949.
- 708 30. Knoester M, Scholvinck EH, Poelman R, Smit S, Vermont CL, Niesters HG, et al. Upsurge of  
709 Enterovirus D68, the Netherlands, 2016. *Emerg Infect Dis.* 2017;23(1):140-3. doi:  
710 10.3201/eid2301.161313. PubMed PMID: 27660916; PubMed Central PMCID:  
711 PMC485176244.
- 712 31. Wei HY, Yeh TK, Hsieh JY, Lin IP, Yang JY. Updates on the molecular epidemiology of  
713 Enterovirus D68 after installation of screening test among acute flaccid paralysis patients in  
714 Taiwan. *Journal of microbiology, immunology, and infection = Wei mian yu gan ran za zhi.*  
715 2018. Epub 2018/01/18. doi: 10.1016/j.jmii.2017.12.001. PubMed PMID: 29339008.
- 716 32. Esposito S, Chidini G, Cinnante C, Napolitano L, Giannini A, Terranova L, et al. Acute flaccid  
717 myelitis associated with enterovirus-D68 infection in an otherwise healthy child. *Virol J.*  
718 2017;14(1):4. doi: 10.1186/s12985-016-0678-0. PubMed PMID: 28081720; PubMed Central  
719 PMCID: PMC485234096.
- 720 33. Wang G, Zhuge J, Huang W, Nolan SM, Gilrane VL, Yin C, et al. Enterovirus D68 Subclade B3  
721 Strain Circulating and Causing an Outbreak in the United States in 2016. *Sci Rep.*  
722 2017;7(1):1242. doi: 10.1038/s41598-017-01349-4. PubMed PMID: 28455514; PubMed Central  
723 PMCID: PMC485430842.
- 724 34. De Jesus N, Franco D, Paul A, Wimmer E, Cello J. Mutation of a single conserved nucleotide  
725 between the cloverleaf and internal ribosome entry site attenuates poliovirus neurovirulence. *J*  
726 *Virol.* 2005;79(22):14235-43. Epub 2005/10/29. doi: 10.1128/jvi.79.22.14235-14243.2005.  
727 PubMed PMID: 16254358; PubMed Central PMCID: PMC4851280220.
- 728 35. Agol VI, Drozdov SG, Ivannikova TA, Kolesnikova MS, Korolev MB, Tolskaya EA. Restricted  
729 growth of attenuated poliovirus strains in cultured cells of a human neuroblastoma. *J Virol.*  
730 1989;63(9):4034-8. Epub 1989/09/01. PubMed PMID: 2548013; PubMed Central PMCID:  
731 PMC485251001.
- 732 36. Chan SY, Sam IC, Lai JK, Chan YF. Cellular proteome alterations in response to enterovirus 71  
733 and coxsackievirus A16 infections in neuronal and intestinal cell lines. *Journal of proteomics.*  
734 2015;125:121-30. Epub 2015/05/25. doi: 10.1016/j.jprot.2015.05.016. PubMed PMID: 26003530.
- 735 37. Su AI, Wiltshire T, Batalov S, Lapp H, Ching KA, Block D, et al. A gene atlas of the mouse and  
736 human protein-encoding transcriptomes. *Proc Natl Acad Sci U S A.* 2004;101(16):6062-7. Epub  
737 2004/04/13. doi: 10.1073/pnas.0400782101. PubMed PMID: 15075390; PubMed Central  
738 PMCID: PMC485395923.
- 739 38. Shen EH, Overly CC, Jones AR. The Allen Human Brain Atlas: comprehensive gene expression  
740 mapping of the human brain. *Trends in neurosciences.* 2012;35(12):711-4. Epub 2012/10/09. doi:  
741 10.1016/j.tins.2012.09.005. PubMed PMID: 23041053.
- 742 39. Hawrylycz MJ, Lein ES, Guillozet-Bongaarts AL, Shen EH, Ng L, Miller JA, et al. An  
743 anatomically comprehensive atlas of the adult human brain transcriptome. *Nature.*  
744 2012;489(7416):391-9. Epub 2012/09/22. doi: 10.1038/nature11405. PubMed PMID: 22996553;  
745 PubMed Central PMCID: PMC4854243026.

- 746 40. Wu C, Jin X, Tsueng G, Afrasiabi C, Su AI. BioGPS: building your own mash-up of gene  
747 annotations and expression profiles. *Nucleic Acids Research*. 2016;44(Database issue):D313-D6.  
748 doi: 10.1093/nar/gkv1104. PubMed PMID: PMC4702805.
- 749 41. Wu C, Orozco C, Boyer J, Leglise M, Goodale J, Batalov S, et al. BioGPS: an extensible and  
750 customizable portal for querying and organizing gene annotation resources. *Genome Biology*.  
751 2009;10(11):R130-R. doi: 10.1186/gb-2009-10-11-r130. PubMed PMID: PMC3091323.
- 752 42. Li C, Wang JC, Taylor MW, Zlotnick A. In vitro assembly of an empty picornavirus capsid  
753 follows a dodecahedral path. *J Virol*. 2012;86(23):13062-9. Epub 2012/09/28. doi:  
754 10.1128/jvi.01033-12. PubMed PMID: 23015694; PubMed Central PMCID: PMC3497625.
- 755 43. Hixon AM, Clarke P, Tyler KL. Evaluating Treatment Efficacy in a Mouse Model of Enterovirus  
756 D68–Associated Paralytic Myelitis. *The Journal of Infectious Diseases*. 2017;216(10):1245-53.  
757 doi: 10.1093/infdis/jix468.
- 758 44. Oberste MS, Maher K, Schnurr D, Flemister MR, Lovchik JC, Peters H, et al. Enterovirus 68 is  
759 associated with respiratory illness and shares biological features with both the enteroviruses and  
760 the rhinoviruses. *J Gen Virol*. 2004;85(Pt 9):2577-84. Epub 2004/08/11. doi:  
761 10.1099/vir.0.79925-0. PubMed PMID: 15302951.
- 762 45. Kovalevich J, Langford D. Considerations for the use of SH-SY5Y neuroblastoma cells in  
763 neurobiology. *Methods in molecular biology (Clifton, NJ)*. 2013;1078:9-21. Epub 2013/08/27.  
764 doi: 10.1007/978-1-62703-640-5\_2. PubMed PMID: 23975817; PubMed Central PMCID:  
765 PMC35127451.
- 766 46. Pahlman S, Ruusala AI, Abrahamsson L, Mattsson ME, Esscher T. Retinoic acid-induced  
767 differentiation of cultured human neuroblastoma cells: a comparison with phorbol ester-induced  
768 differentiation. *Cell differentiation*. 1984;14(2):135-44. Epub 1984/06/01. PubMed PMID:  
769 6467378.
- 770 47. Royston L, Essaidi-Laziosi M, Pérez-Rodríguez FJ, Piuz I, Geiser J, Krause K-H, et al. Viral  
771 chimeras decrypt the role of enterovirus capsid proteins in viral tropism, acid sensitivity and  
772 optimal growth temperature. *PLOS Pathogens*. 2018;14(4):e1006962. doi:  
773 10.1371/journal.ppat.1006962.
- 774 48. Lopes FM, Schroder R, da Frota ML, Jr., Zanotto-Filho A, Muller CB, Pires AS, et al.  
775 Comparison between proliferative and neuron-like SH-SY5Y cells as an in vitro model for  
776 Parkinson disease studies. *Brain research*. 2010;1337:85-94. Epub 2010/04/13. doi:  
777 10.1016/j.brainres.2010.03.102. PubMed PMID: 20380819.
- 778 49. Biedler JL, Roffler-Tarlov S, Schachner M, Freedman LS. Multiple neurotransmitter synthesis by  
779 human neuroblastoma cell lines and clones. *Cancer Res*. 1978;38(11 Pt 1):3751-7. PubMed  
780 PMID: 29704.
- 781 50. Shastry P, Basu A, Rajadhyaksha MS. Neuroblastoma cell lines--a versatile in vitro model in  
782 neurobiology. *The International journal of neuroscience*. 2001;108(1-2):109-26. Epub  
783 2001/05/01. doi: 10.3109/00207450108986509. PubMed PMID: 11328706.
- 784 51. Cordey S, Petty TJ, Schibler M, Martinez Y, Gerlach D, van Belle S, et al. Identification of site-  
785 specific adaptations conferring increased neural cell tropism during human enterovirus 71  
786 infection. *PLoS Pathog*. 2012;8(7):e1002826. Epub 2012/08/23. doi:  
787 10.1371/journal.ppat.1002826. PubMed PMID: 22910880; PubMed Central PMCID:  
788 PMC3406088.
- 789 52. Kung CM, King CC, Lee CN, Huang LM, Lee PI, Kao CL. Differences in replication capacity  
790 between enterovirus 71 isolates obtained from patients with encephalitis and those obtained from  
791 patients with herpangina in Taiwan. *J Med Virol*. 2007;79(1):60-8. Epub 2006/11/30. doi:  
792 10.1002/jmv.20761. PubMed PMID: 17133556.
- 793 53. Kok CC, Phuektes P, Bek E, McMinn PC. Modification of the untranslated regions of human  
794 enterovirus 71 impairs growth in a cell-specific manner. *J Virol*. 2012;86(1):542-52. Epub  
795 2011/10/28. doi: 10.1128/jvi.00069-11. PubMed PMID: 22031931; PubMed Central PMCID:  
796 PMC3255918.



- 797 54. La Monica N, Racaniello VR. Differences in replication of attenuated and neurovirulent  
798 polioviruses in human neuroblastoma cell line SH-SY5Y. *J Virol.* 1989;63(5):2357-60. Epub  
799 1989/05/01. PubMed PMID: 2539524; PubMed Central PMCID: PMCPMC250657.
- 800 55. Ong KC, Wong KT. Understanding Enterovirus 71 Neuropathogenesis and Its Impact on Other  
801 Neurotropic Enteroviruses. *Brain Pathol.* 2015;25(5):614-24. doi: 10.1111/bpa.12279. PubMed  
802 PMID: 26276025.
- 803 56. Yogarajah T, Ong KC, Perera D, Wong KT. Enterovirus A71 and coxsackievirus A16 show  
804 different replication kinetics in human neuronal and non-neuronal cell lines. *Arch Virol.*  
805 2017;162(3):727-37. doi: 10.1007/s00705-016-3157-4. PubMed PMID: 27878462.
- 806 57. Yun SI, Choi YJ, Song BH, Lee YM. 3' cis-acting elements that contribute to the competence and  
807 efficiency of Japanese encephalitis virus genome replication: functional importance of sequence  
808 duplications, deletions, and substitutions. *J Virol.* 2009;83(16):7909-30. Epub 2009/06/06. doi:  
809 10.1128/jvi.02541-08. PubMed PMID: 19494005; PubMed Central PMCID: PMCPMC2715749.
- 810 58. Vesanen M, Salminen M, Wessman M, Lankinen H, Sistonen P, Vaheri A. Morphological  
811 differentiation of human SH-SY5Y neuroblastoma cells inhibits human immunodeficiency virus  
812 type 1 infection. *J Gen Virol.* 1994;75 ( Pt 1):201-6. Epub 1994/01/01. doi: 10.1099/0022-1317-  
813 75-1-201. PubMed PMID: 8113728.
- 814 59. Luo MH, Fortunato EA. Long-term infection and shedding of human cytomegalovirus in T98G  
815 glioblastoma cells. *J Virol.* 2007;81(19):10424-36. Epub 2007/07/27. doi: 10.1128/jvi.00866-07.  
816 PubMed PMID: 17652378; PubMed Central PMCID: PMCPMC2045481.
- 817 60. Christensen J, Steain M, Slobedman B, Abendroth A. Differentiated neuroblastoma cells provide  
818 a highly efficient model for studies of productive varicella-zoster virus infection of neuronal cells.  
819 *J Virol.* 2011;85(16):8436-42. Epub 2011/06/03. doi: 10.1128/jvi.00515-11. PubMed PMID:  
820 21632750; PubMed Central PMCID: PMCPMC3147949.
- 821 61. Dhanwani R, Khan M, Bhaskar AS, Singh R, Patro IK, Rao PV, et al. Characterization of  
822 Chikungunya virus infection in human neuroblastoma SH-SY5Y cells: role of apoptosis in  
823 neuronal cell death. *Virus Res.* 2012;163(2):563-72. Epub 2012/01/03. doi:  
824 10.1016/j.virusres.2011.12.009. PubMed PMID: 22210004.
- 825 62. Santos-Lopez G, Cruz C, Pazos N, Vallejo V, Reyes-Leyva J, Tapia-Ramirez J. Two clones  
826 obtained from Urabe AM9 mumps virus vaccine differ in their replicative efficiency in  
827 neuroblastoma cells. *Microbes and infection.* 2006;8(2):332-9. Epub 2005/11/22. doi:  
828 10.1016/j.micinf.2005.06.031. PubMed PMID: 16298153.
- 829 63. Castellanos JE, Neissa JI, Camacho SJ. Dengue virus induces apoptosis in SH-SY5Y human  
830 neuroblastoma cells. *Biomedica : revista del Instituto Nacional de Salud.* 2016;36(0):156-8. Epub  
831 2016/09/14. doi: 10.7705/biomedica.v36i0.2984. PubMed PMID: 27622805.
- 832 64. Chan JF, Yip CC, Tsang JO, Tee KM, Cai JP, Chik KK, et al. Differential cell line susceptibility  
833 to the emerging Zika virus: implications for disease pathogenesis, non-vector-borne human  
834 transmission and animal reservoirs. *Emerg Microbes Infect.* 2016;5:e93. doi:  
835 10.1038/emi.2016.99. PubMed PMID: 27553173; PubMed Central PMCID: PMCPMC5034105.
- 836 65. Sacramento CQ, de Melo GR, de Freitas CS, Rocha N, Hoelz LV, Miranda M, et al. The  
837 clinically approved antiviral drug sofosbuvir inhibits Zika virus replication. *Sci Rep.*  
838 2017;7:40920. Epub 2017/01/18. doi: 10.1038/srep40920. PubMed PMID: 28098253; PubMed  
839 Central PMCID: PMCPMC5241873.
- 840 66. Ahmad W, Li Y, Guo Y, Wang X, Duan M, Guan Z, et al. Rabies virus co-localizes with early  
841 (Rab5) and late (Rab7) endosomal proteins in neuronal and SH-SY5Y cells. *Virologica Sinica.*  
842 2017;32(3):207-15. Epub 2017/06/22. doi: 10.1007/s12250-017-3968-9. PubMed PMID:  
843 28634871.
- 844 67. Shipley MM, Mangold CA, Kuny CV, Szpara ML. Differentiated Human SH-SY5Y Cells  
845 Provide a Reductionist Model of Herpes Simplex Virus 1 Neurotropism. *J Virol.* 2017;91(23).  
846 Epub 2017/09/29. doi: 10.1128/jvi.00958-17. PubMed PMID: 28956768; PubMed Central  
847 PMCID: PMCPMC5686721.

- 848 68. Michaelis M, Kleinschmidt MC, Doerr HW, Cinatl J, Jr. Minocycline inhibits West Nile virus  
849 replication and apoptosis in human neuronal cells. *The Journal of antimicrobial chemotherapy*.  
850 2007;60(5):981-6. Epub 2007/09/18. doi: 10.1093/jac/dkm307. PubMed PMID: 17872917.
- 851 69. Watanabe S, Ohno S, Shirogane Y, Suzuki SO, Koga R, Yanagi Y. Measles virus mutants  
852 possessing the fusion protein with enhanced fusion activity spread effectively in neuronal cells,  
853 but not in other cells, without causing strong cytopathology. *J Virol*. 2015;89(5):2710-7. Epub  
854 2014/12/19. doi: 10.1128/jvi.03346-14. PubMed PMID: 25520515; PubMed Central PMCID:  
855 PMCPMC4325728.
- 856 70. Tapparel C, Siegrist F, Petty TJ, Kaiser L. Picornavirus and enterovirus diversity with associated  
857 human diseases. *Infect Genet Evol*. 2013;14:282-93. doi: 10.1016/j.meegid.2012.10.016. PubMed  
858 PMID: 23201849.
- 859 71. Jaramillo-Gutierrez G, Benschop KS, Claas EC, de Jong AS, van Loon AM, Pas SD, et al.  
860 September through October 2010 multi-centre study in the Netherlands examining laboratory  
861 ability to detect enterovirus 68, an emerging respiratory pathogen. *J Virol Methods*. 2013;190(1-  
862 2):53-62. Epub 2013/03/06. doi: 10.1016/j.jviromet.2013.02.010. PubMed PMID: 23458694.
- 863 72. Clusters of acute respiratory illness associated with human enterovirus 68--Asia, Europe, and  
864 United States, 2008-2010. *MMWR Morbidity and mortality weekly report*. 2011;60(38):1301-4.  
865 Epub 2011/10/01. PubMed PMID: 21956405.
- 866 73. Cheng Y, Ma Z, Kim BH, Wu W, Cayting P, Boyle AP, et al. Principles of regulatory  
867 information conservation between mouse and human. *Nature*. 2014;515(7527):371-5. Epub  
868 2014/11/21. doi: 10.1038/nature13985. PubMed PMID: 25409826; PubMed Central PMCID:  
869 PMCPMC4343047.
- 870 74. Odom DT, Dowell RD, Jacobsen ES, Gordon W, Danford TW, MacIsaac KD, et al. Tissue-  
871 specific transcriptional regulation has diverged significantly between human and mouse. *Nature*  
872 *genetics*. 2007;39(6):730-2. Epub 2007/05/29. doi: 10.1038/ng2047. PubMed PMID: 17529977;  
873 PubMed Central PMCID: PMCPMC3797512.
- 874 75. Lin S, Lin Y, Nery JR, Ulrich MA, Breschi A, Davis CA, et al. Comparison of the transcriptional  
875 landscapes between human and mouse tissues. *Proc Natl Acad Sci U S A*. 2014;111(48):17224-9.  
876 Epub 2014/11/22. doi: 10.1073/pnas.1413624111. PubMed PMID: 25413365; PubMed Central  
877 PMCID: PMCPMC4260565.
- 878 76. Seok J, Warren HS, Cuenca AG, Mindrinos MN, Baker HV, Xu W, et al. Genomic responses in  
879 mouse models poorly mimic human inflammatory diseases. *Proceedings of the National*  
880 *Academy of Sciences of the United States of America*. 2013;110(9):3507-12. doi:  
881 10.1073/pnas.1222878110. PubMed PMID: PMC3587220.
- 882 77. Takao K, Miyakawa T. Genomic responses in mouse models greatly mimic human inflammatory  
883 diseases. *Proceedings of the National Academy of Sciences of the United States of America*.  
884 2015;112(4):1167-72. doi: 10.1073/pnas.1401965111. PubMed PMID: PMC4313832.
- 885 78. Krishnaswami SR, Grindberg RV, Novotny M, Venepally P, Lacar B, Bhutani K, et al. Using  
886 single nuclei for RNA-seq to capture the transcriptome of postmortem neurons. *Nature protocols*.  
887 2016;11(3):499-524. Epub 2016/02/20. doi: 10.1038/nprot.2016.015. PubMed PMID: 26890679;  
888 PubMed Central PMCID: PMCPMC4941947.
- 889 79. Grindberg RV, Yee-Greenbaum JL, McConnell MJ, Novotny M, O'Shaughnessy AL, Lambert  
890 GM, et al. RNA-sequencing from single nuclei. *Proc Natl Acad Sci U S A*. 2013;110(49):19802-  
891 7. Epub 2013/11/20. doi: 10.1073/pnas.1319700110. PubMed PMID: 24248345; PubMed Central  
892 PMCID: PMCPMC3856806.
- 893 80. Li B, Dewey CN. RSEM: accurate transcript quantification from RNA-Seq data with or without a  
894 reference genome. *BMC bioinformatics*. 2011;12:323. Epub 2011/08/06. doi: 10.1186/1471-  
895 2105-12-323. PubMed PMID: 21816040; PubMed Central PMCID: PMCPMC3163565.
- 896

## 897 Supporting Information

898

899 **S1 Table. List of strains used in this study.**

900

901 **S1 Fig. EV-D68 virus titers in A549 cells.** A549 cells were grown to 90% confluence in  
902 96 well plates before infection with EV-D68 US/MO/47, US/TN and VR1197 EV-D68 at a  
903 MOI = 0.1. Infection media was removed after 2 hpi to reduce background. Cell culture  
904 lysate/supernatants were collected at various time points after infection, and viral titers  
905 measured using endpoint dilutions for growth in HeLa cells. Dotted black line indicates  
906 the limit of detection. Error bars represent SEM of three biological replicates.

907

908 **S2 Fig. EV-D68 virus titers in three different cell cultures with additional MOIs.**

909 Cells from three different cell lines – SH-SY5Y, HTB10, and HeLa were grown to 90%  
910 confluence in 96 well plates before infection with EV-D68 US/MO/47, US/TN and VR1197  
911 EV-D68 at a MOI = 1.0 and MOI = 0.01. Infection media was removed after 2 hpi to  
912 reduce background from MOI = 1.0. Cell culture lysate/supernatants were collected at  
913 various time points after infection, and viral titers measured using endpoint dilutions for  
914 growth in HeLa cells. Dotted black line indicates the limit of detection. Error bars  
915 represent SEM of three biological replicates.

916

917 **S3 Fig. Cell viability in cells infected with EV-D68 at 37°C.** Using replicate plates, cell

918 viability was measured by quantifying ATP content as determined by CellTiter Glo  
919 (Promega) luminescence. Cell viability calculated relative to mock. Error bars represent  
920 SEM of four replicates.

921

922 **S4 Fig. HRV does not infect SH-SY5Y.** Six different HRV strains and two EV-D68 strains  
923 were used to infect HeLa and SH-SY5Y cell cultures grown in a 96-well plate at a MOI of  
924 0.1 before visualization at 72 hpi.

925

926 **S5 Fig. EV-D68 virus titers in differentiated SH-SY5Y cells.** Differentiated SH-SY5Y  
927 were infected with 6 different isolates of EV-D68 at a MOI of 0.1. Cell culture  
928 lysate/supernatants was collected at various time points. Viral titer was determined by  
929 TCID<sub>50</sub> in HeLa cells. Dotted black line indicates the limit of detection. Error bars  
930 represent SEM of three biological replicates. Error bars represent SEM of three  
931 replicates.

932

933 **S6 Fig. EV-D68 strain growth in human postnatal cortical neurons.** Human postnatal  
934 day 0 brain neurons were maintained to day 7 *in vitro* before infection with EV-D68  
935 US/MO/47, US/TN, or VR1197 at a MOI = 0.01. Cell culture lysates/supernatant were  
936 collected at various times post viral infection, and viral titers were measured using  
937 endpoint dilutions for growth in RD cells. The x-axis indicates the limit of detection. Error  
938 bars represent SD of three biological replicates.

939

**A**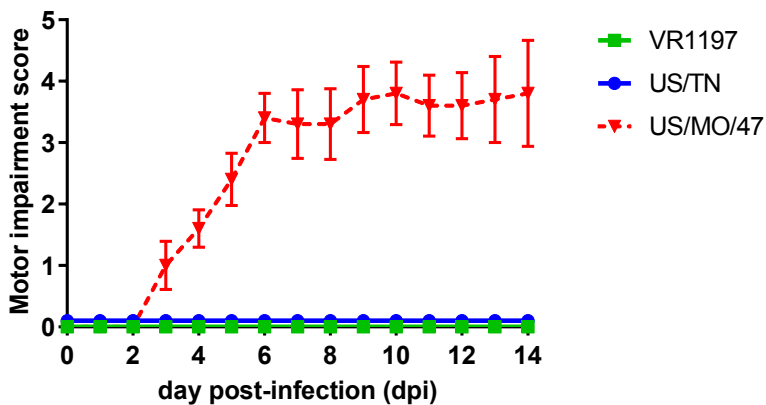**B**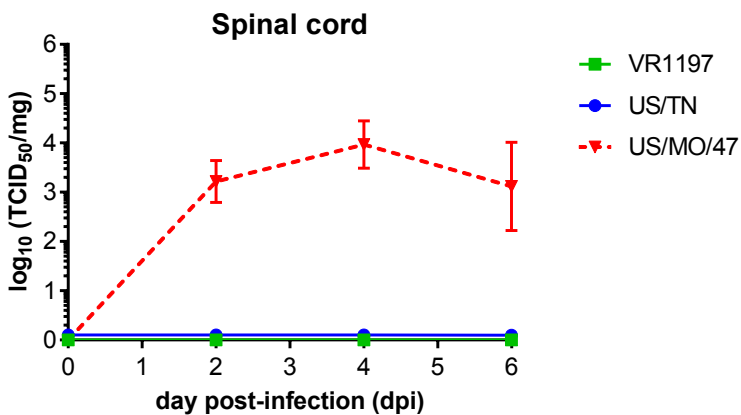**C**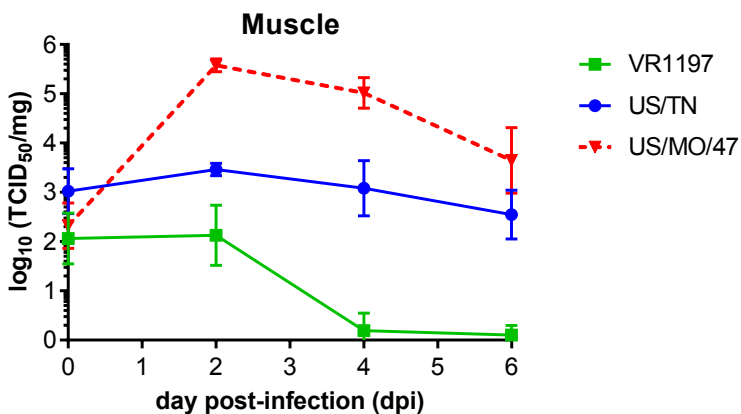



**A**

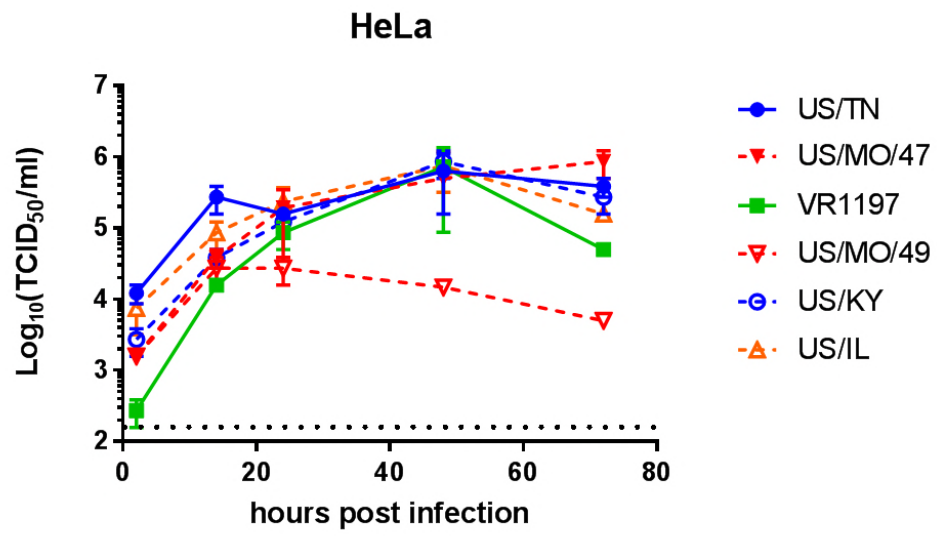

**B**

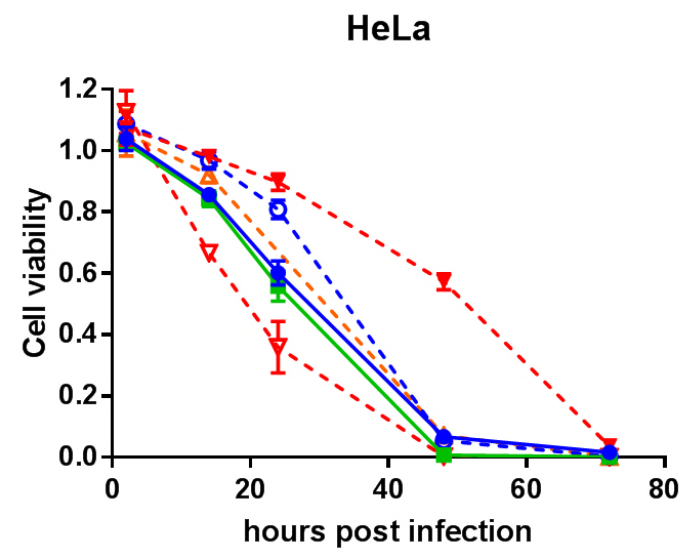

**C**

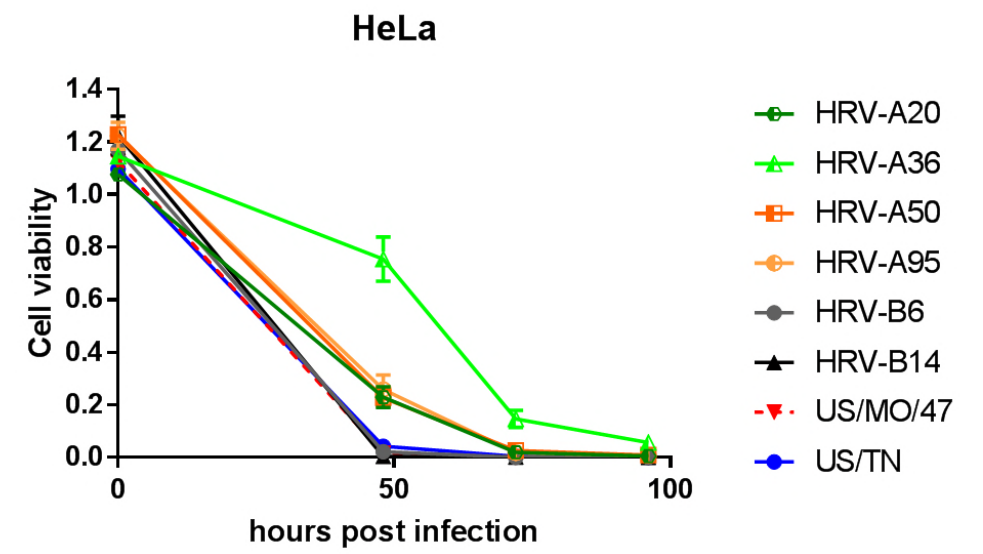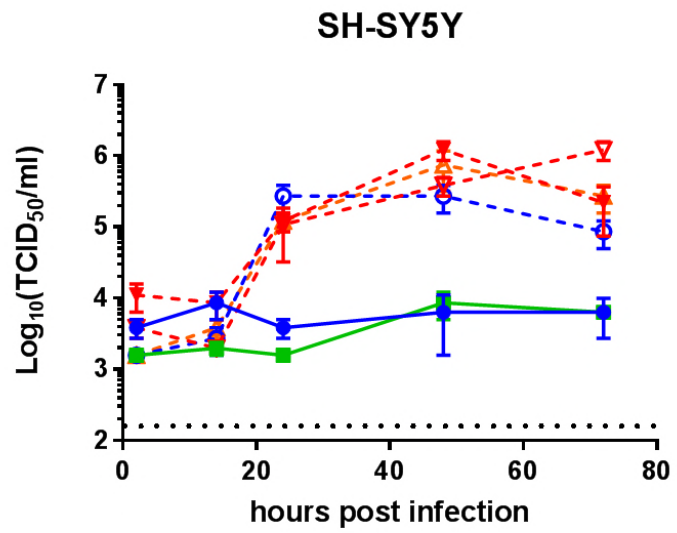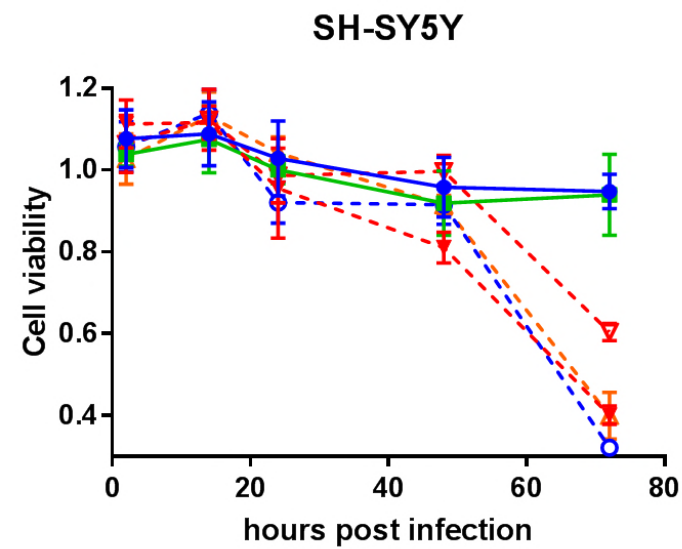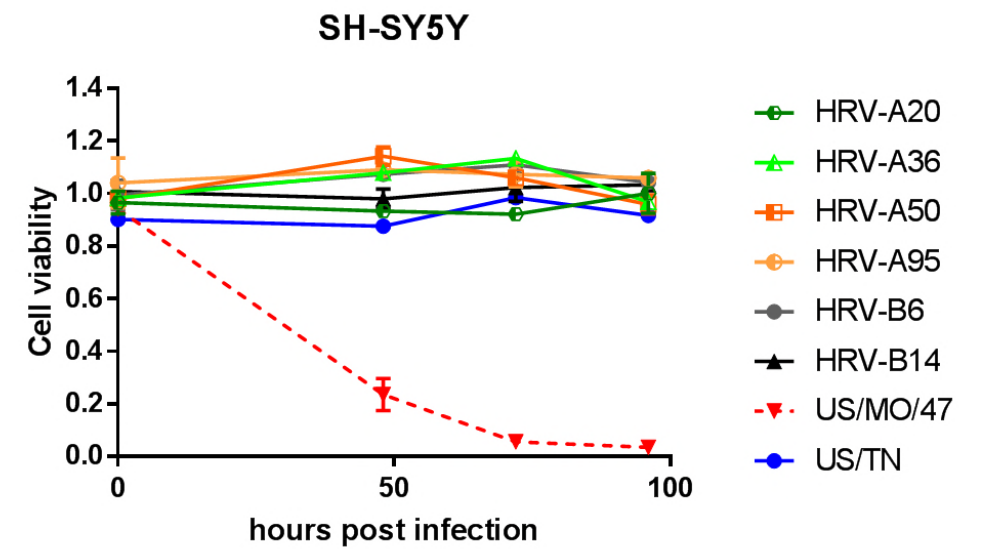

**D**

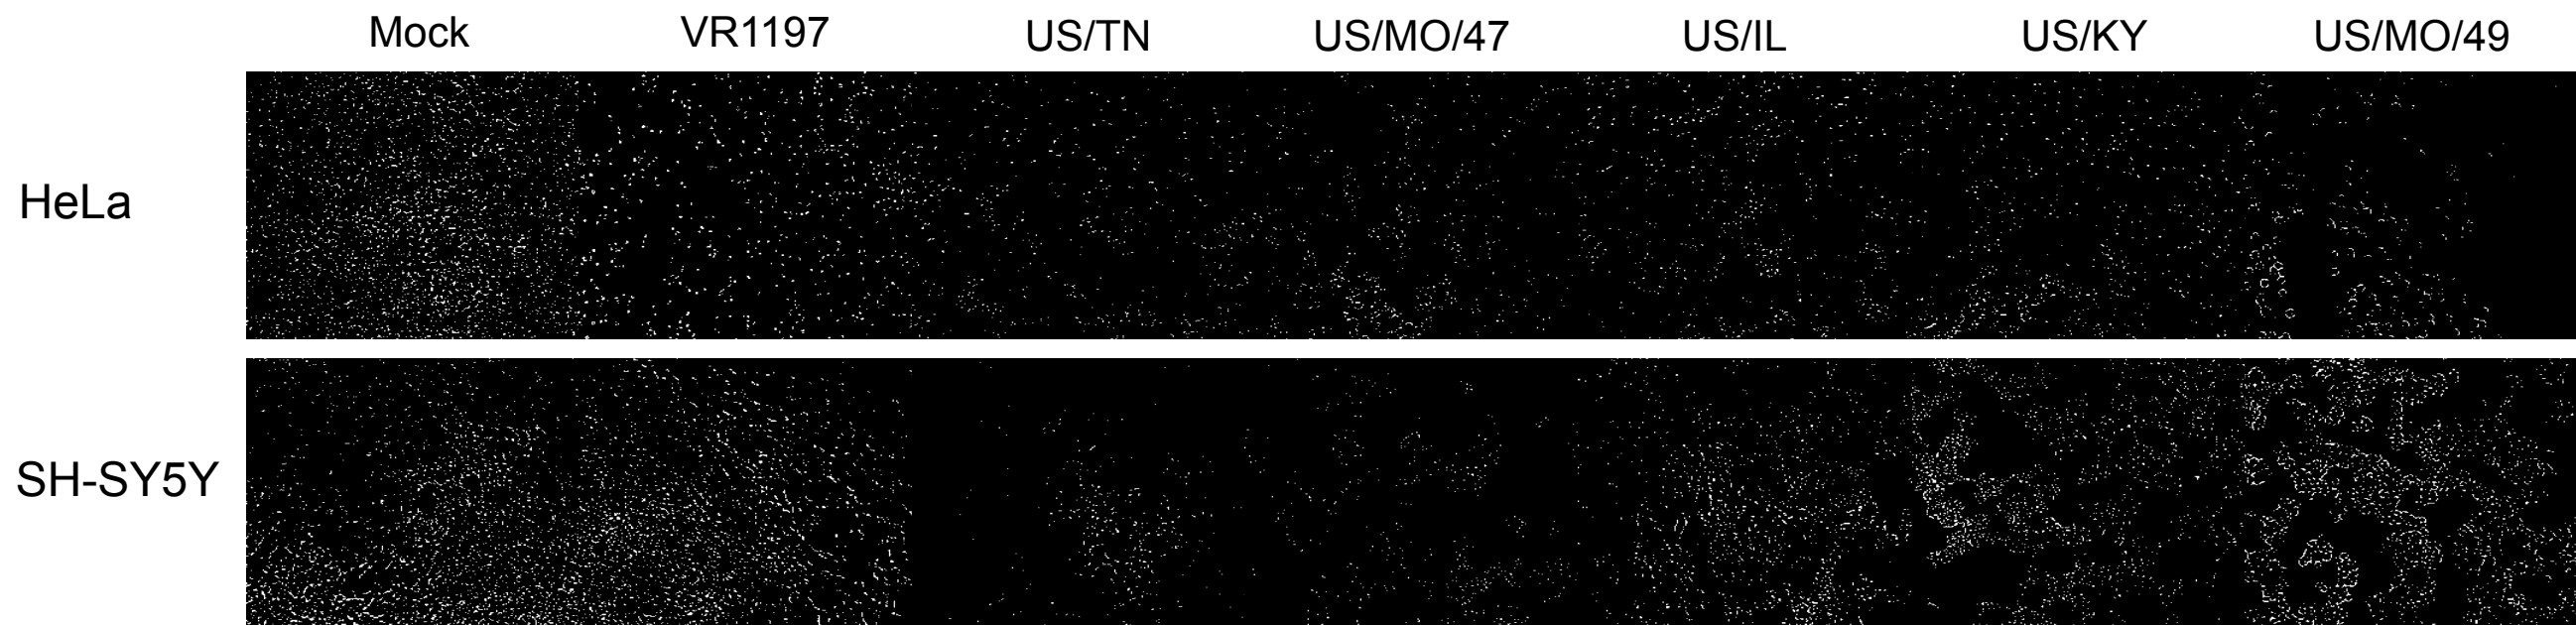

## HeLa

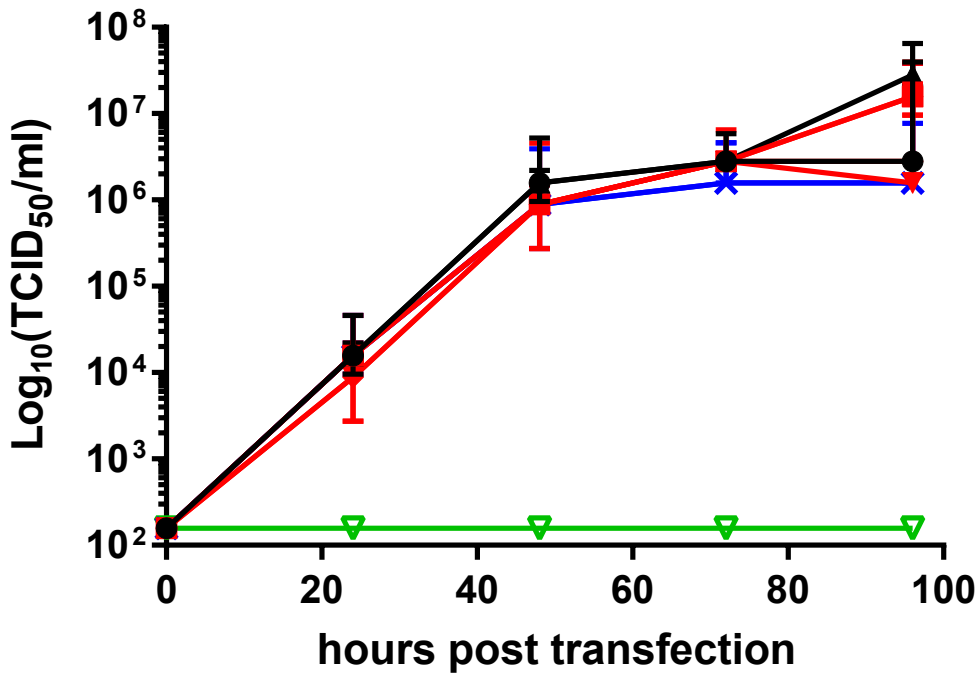

- VR1197
- US/MO/47
- ▲ US/TN
- ▼ US/MO/49
- ◆ US/KY
- US/IL
- × HRV A95
- HRV B14
- ▽ Mock

## SH-SY5Y

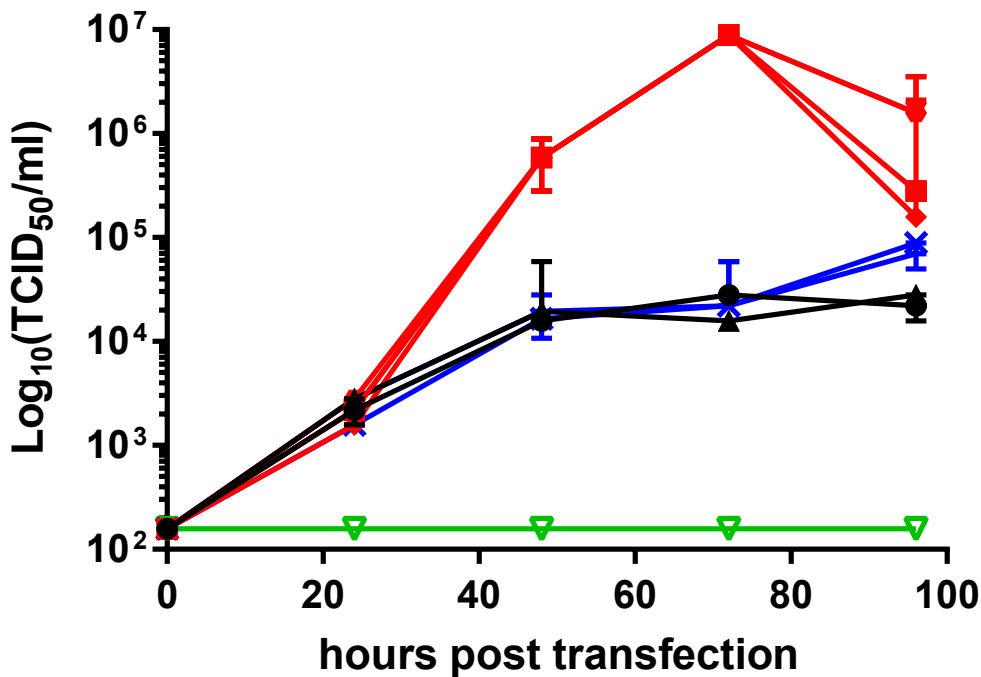

- VR1197
- US/MO/47
- ▲ US/TN
- ▼ US/MO/49
- ◆ US/KY
- US/IL
- × HRV A95
- HRV B14
- ▽ Mock

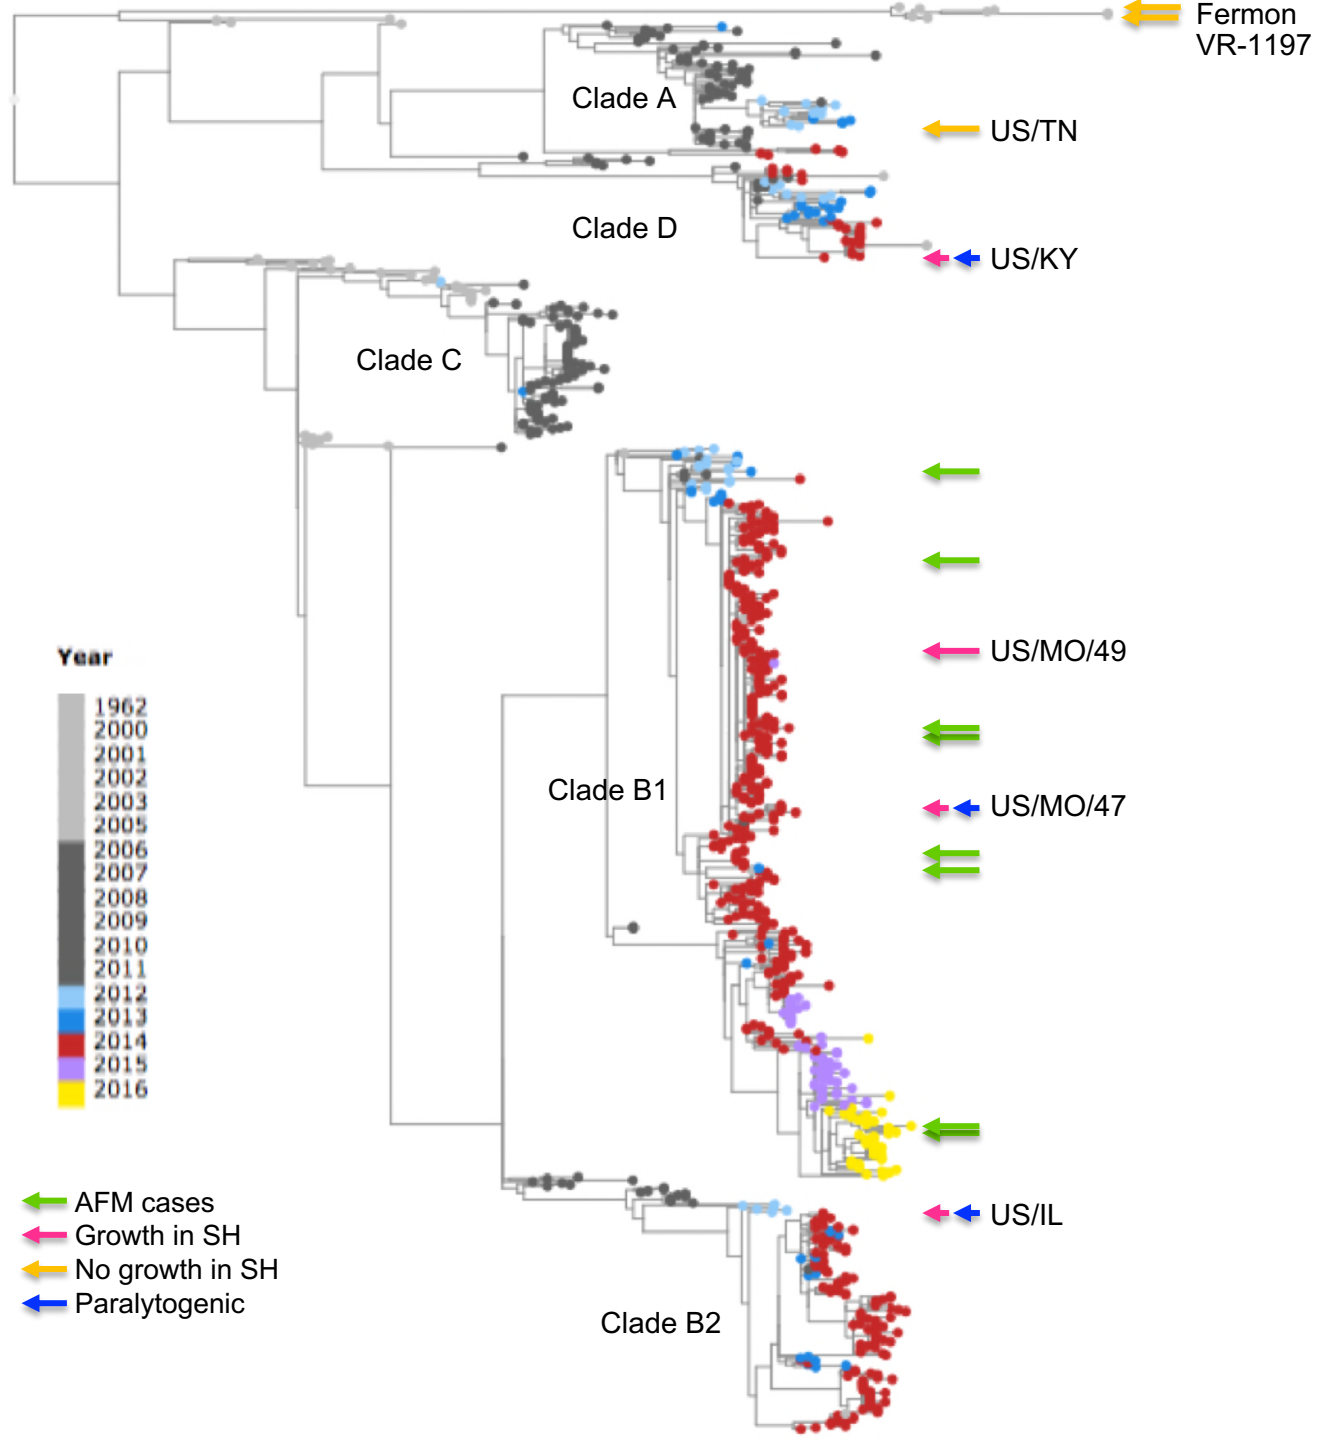



A

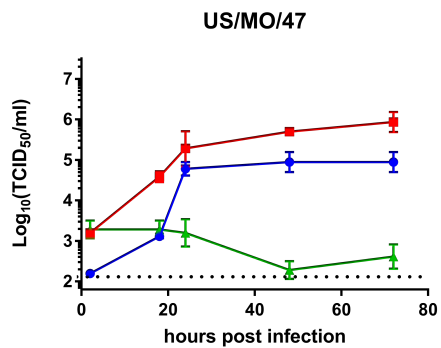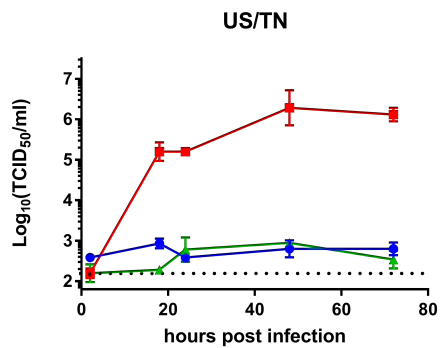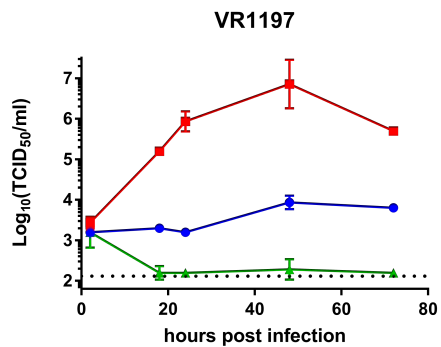

B

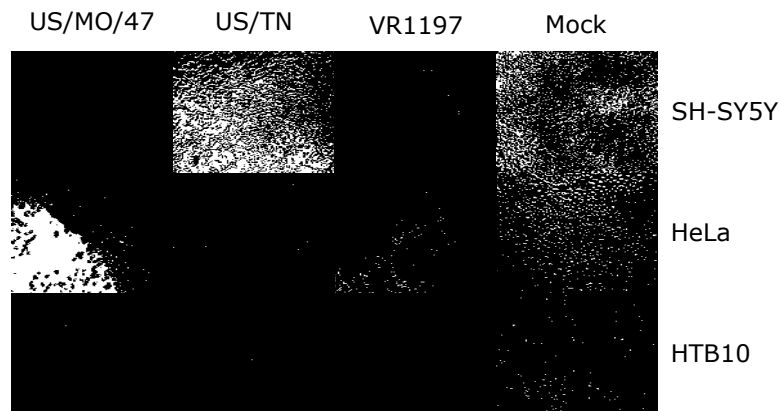

C

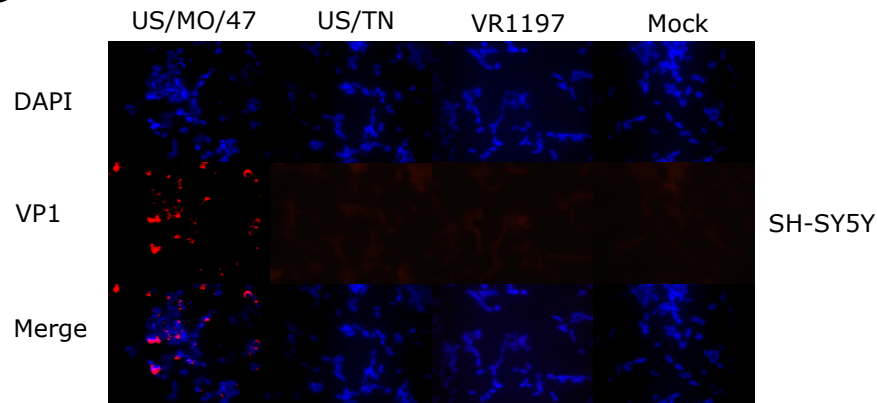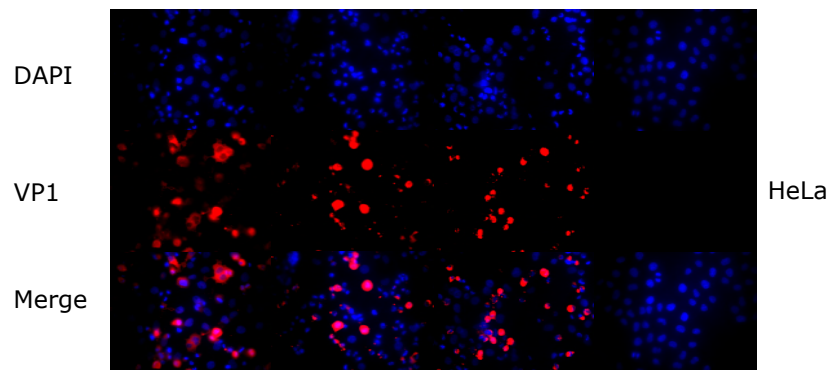

Source: http://biorxiv.org/content/10.1101/331116v1.full.pdf
